# Supplementary material for: The Impact of the Anticoagulant Type in Blood Collection Tubes on Circulating Extracellular Plasma MicroRNA Profiles Revealed by Small RNA Sequencing
Source: Int J Mol Sci. 2022 Sep 7;23(18):10340. doi: 10.3390/ijms231810340 (PMC9499385; doi:10.3390/ijms231810340)
Supplement: Supplementary file 1 [file ijms-23-10340-s001.zip]

Archive with 4 entries (4 files):
- Supplementary Figures.pdf
- Table S1.xlsx
- Table S2.xlsx
- Table S3.xlsx
