# Supplementary material for: The Impact of the Anticoagulant Type in Blood Collection Tubes on Circulating Extracellular Plasma MicroRNA Profiles Revealed by Small RNA Sequencing
Source: Int J Mol Sci. 2022 Sep 7;23(18):10340. doi: 10.3390/ijms231810340 (PMC9499385; doi:10.3390/ijms231810340)
Supplement: Supplementary file 1 [file ijms-23-10340-s001.zip › Table S1.xlsx]

## Sheet: Sheet1
Isoform	MiRNA	Isoform sequence	5'modifications	3'modifications	NucVar	s01A	s01C	s01D	s02B	s02C	s02D	s03A	s03B	s03D	s04A	s04B	s04C	s05B	s05D	s06A	s06B	s06C	s07A	s07B	s07C	s07D	s08A	s08B	s08C	s08D	s09A	s09D	s10A	s10B	s10C	Mean count
let-7a-3p_0_1	let-7a-3p	CTATACAATCTACTGTCTTTCT		3'non-temp		0	88	0	43	0	0	34	110	13	43	0	31	85	0	0	27	0	0	0	0	0	0	0	0	12	0	0	29	0	0	17.1667
let-7a-5p_0_-1	let-7a-5p	TGAGGTAGTAGGTTGTATAGT		3'trim		985	1969	209	1774	448	543	928	1063	387	45	329	281	1077	556	1349	1167	1878	2830	631	856	1048	1551	1077	527	505	615	394	786	80	369	875.233
let-7a-5p_0_-2	let-7a-5p	TGAGGTAGTAGGTTGTATAG		3'trim		498	374	429	944	9	963	43	137	489	1	149	61	273	275	419	139	493	209	533	680	702	211	370	259	548	104	329	640	99	201	352.7
let-7a-5p_0_0	let-7a-5p	TGAGGTAGTAGGTTGTATAGTT		canon		2359	3831	215	2902	583	405	996	871	134	844	287	1441	1091	270	1358	1245	2739	1429	4113	2515	543	1341	729	1244	294	1050	339	885	634	579	1242.2
let-7b-3p_0_-1	let-7b-3p	CTATACAACCTACTGCCTTCC		3'trim		100	98	7	0	0	37	154	65	17	0	0	82	31	58	67	74	1	142	93	1	114	0	24	3	0	80	26	21	0	55	45
let-7b-3p_0_0	let-7b-3p	CTATACAACCTACTGCCTTCCT			22C>T	75	277	34	70	0	39	334	187	34	88	5	192	208	67	252	110	189	298	425	124	20	558	22	40	15	89	0	108	19	53	131.067
let-7b-5p_0_-1	let-7b-5p	TGAGGTAGTAGGTTGTGTGGT		3'trim		8735	8908	7230	5660	1493	11485	5110	6786	11665	3843	7124	4280	6662	9121	10334	4415	8509	14470	11541	9962	22259	5842	4716	4686	9984	4834	8758	14033	3226	5712	8046.1
let-7b-5p_0_0	let-7b-5p	TGAGGTAGTAGGTTGTGTGGTT		canon		26160	32381	14443	22827	6165	30328	18197	22590	26943	15407	16334	16716	19797	21999	26809	16409	27156	40717	39685	32045	62816	11392	12605	13326	16693	17707	22721	36105	10182	16367	23100.7
let-7c-5p_0_-1	let-7c-5p	TGAGGTAGTAGGTTGTATGGT		3'trim		83	220	10	64	0	2	70	61	21	46	0	130	96	2	35	44	13	427	37	100	1	0	5	41	14	81	47	42	22	33	58.2333
let-7c-5p_0_0	let-7c-5p	TGAGGTAGTAGGTTGTATGGTT		canon		210	293	18	229	74	132	153	83	50	311	72	124	179	60	117	317	502	626	266	480	452	3	98	129	76	148	94	230	128	220	195.8
let-7d-3p_0_-1	let-7d-3p	CTATACGACCTGCTGCCTTTC		3'trim		1255	2777	259	2752	1192	1335	4879	3686	967	1713	362	1392	2493	1279	1123	1804	1916	4289	5416	2896	1734	3992	1100	980	523	1532	1242	642	828	1271	1920.97
let-7d-3p_0_-2	let-7d-3p	CTATACGACCTGCTGCCTTT		3'trim		553	1070	481	833	640	1066	2106	1452	1228	941	454	381	1146	1531	1292	820	1977	946	1374	1092	2156	2683	534	591	824	595	904	875	468	693	1056.87
let-7d-3p_0_0	let-7d-3p	CTATACGACCTGCTGCCTTTCT		canon		5638	9241	517	5403	4941	1884	12159	8846	1496	4300	1237	3762	6776	1944	4420	5383	7135	9059	12067	7712	5443	13712	2247	3095	1240	6399	2718	2224	2188	3387	5219.1
let-7d-5p_0_-1	let-7d-5p	AGAGGTAGTAGGTTGCATAGT		3'trim		145	178	74	133	0	123	35	116	90	0	123	119	79	139	222	17	178	0	63	111	492	0	82	279	230	86	34	118	26	124	113.867
let-7d-5p_0_-2	let-7d-5p	AGAGGTAGTAGGTTGCATAG		3'trim		112	217	36	247	0	64	66	245	126	0	10	0	55	75	65	0	89	0	0	287	91	0	0	0	117	0	9	52	52	19	67.8
let-7d-5p_0_0	let-7d-5p	AGAGGTAGTAGGTTGCATAGTT		canon		433	266	8	1000	0	1	63	128	13	0	64	1	6	15	130	208	65	377	298	224	0	0	116	294	49	77	31	46	113	92	137.267
let-7e-5p_0_-1	let-7e-5p	TGAGGTAGGAGGTTGTATAGT		3'trim		145	912	11	137	0	0	154	98	6	121	30	86	13	10	68	49	285	1	184	377	0	0	11	0	0	85	42	16	66	117	100.8
let-7e-5p_0_0	let-7e-5p	TGAGGTAGGAGGTTGTATAGTT		canon		546	1070	27	350	0	94	38	59	27	130	37	133	79	65	142	120	0	558	535	350	0	0	3	4	65	178	17	202	138	145	170.4
let-7f-5p_0_-1	let-7f-5p	TGAGGTAGTAGATTGTATAGT		3'trim		1704	3093	309	3739	722	1768	873	799	357	667	519	588	1007	488	1426	1693	2238	1034	1375	2579	982	1106	412	329	404	738	315	504	231	349	1078.27
let-7f-5p_0_-2	let-7f-5p	TGAGGTAGTAGATTGTATAG		3'trim		549	646	428	1210	124	2472	254	252	487	0	514	98	345	379	257	356	776	121	302	648	189	71	201	5	369	272	160	536	148	327	416.533
let-7f-5p_0_0	let-7f-5p	TGAGGTAGTAGATTGTATAGTT		canon		4728	7111	250	9164	597	1526	1461	1363	209	862	844	1028	1627	359	1686	2162	3241	2079	5710	1596	1268	742	1219	961	348	3261	438	698	348	554	1914.67
let-7g-5p_0_-1	let-7g-5p	TGAGGTAGTAGTTTGTACAGT		3'trim		4168	4743	2468	7401	2305	9745	4826	5041	3984	2512	4422	3869	4478	5336	3833	3349	5935	4470	5058	6562	7007	3517	3668	3796	3895	3498	4521	5181	1952	2843	4479.43
let-7g-5p_0_0	let-7g-5p	TGAGGTAGTAGTTTGTACAGTT		canon		7660	10856	927	10597	2264	4661	4090	6360	1765	4313	3647	5255	6489	2736	5507	5963	8493	7946	8988	8359	7223	4663	5994	4103	2318	5459	1933	4637	1987	2048	5241.37
let-7i-3p_0_-2	let-7i-3p	CTGCGCAAGCTACTGCCTTG		3'trim		0	0	4	0	0	29	0	0	11	0	15	0	26	18	0	0	0	0	0	0	0	86	27	0	13	0	38	9	0	41	10.5667
let-7i-5p_0_-1	let-7i-5p	TGAGGTAGTAGTTTGTGCTGT		3'trim		756	454	694	3418	852	4126	1031	617	680	50	425	456	506	1112	479	747	563	924	469	499	1083	282	389	874	821	320	787	563	571	426	832.467
let-7i-5p_0_-2	let-7i-5p	TGAGGTAGTAGTTTGTGCTG		3'trim		441	1002	637	1333	1052	2624	564	338	556	213	427	250	183	1279	236	274	460	260	909	573	942	534	334	640	1143	286	491	560	90	271	630.067
let-7i-5p_0_0	let-7i-5p	TGAGGTAGTAGTTTGTGCTGTT		canon		2872	5450	491	11421	4921	4135	1765	2894	504	1299	1396	1469	2336	1647	1883	2023	2507	1516	3617	2680	1954	1425	2038	2305	853	1616	558	1741	580	896	2359.73
let-7i-5p_0_1	let-7i-5p	TGAGGTAGTAGTTTGTGCTGTTA		3'non-temp		443	437	195	1890	819	1296	899	808	292	61	218	110	627	323	521	518	676	1302	1360	579	675	56	473	642	160	443	205	632	357	196	573.767
miR-1-3p_-1_0	miR-1-3p	GGAATGTAAAGAAGTATGTAT	5'trim			96	240	25	174	0	0	17	59	2	134	11	0	0	0	13	17	55	280	457	839	128	0	48	65	26	64	0	4	0	0	91.8
miR-1-3p_0_0	miR-1-3p	TGGAATGTAAAGAAGTATGTAT		canon		755	2453	136	961	108	163	633	308	21	89	82	447	475	100	116	239	354	1949	4788	4531	1044	0	230	224	15	194	35	57	64	56	687.567
miR-100-5p_0_-1	miR-100-5p	AACCCGTAGATCCGAACTTGT		3'trim		214	1000	50	800	1144	257	687	382	133	653	173	496	699	312	433	612	1180	860	1929	1219	437	313	489	548	263	513	253	284	402	174	563.633
miR-100-5p_0_-2	miR-100-5p	AACCCGTAGATCCGAACTTG		3'trim		200	527	42	397	566	226	165	657	26	714	143	572	849	274	249	417	536	1425	2164	917	307	214	241	436	184	343	244	226	290	318	462.3
miR-101-3p_1_-1	miR-101-3p	GTACAGTACTGTGATAACTGA	5'temp	3'trim		429	877	463	350	61	260	301	895	398	2	514	201	623	830	461	331	471	458	477	769	381	952	693	169	735	309	685	459	346	293	473.1
miR-101-3p_1_-2	miR-101-3p	GTACAGTACTGTGATAACTG	5'temp	3'trim		539	818	614	802	238	442	429	1329	552	469	873	287	387	1092	205	280	832	96	1537	715	1343	1357	298	740	923	228	733	661	371	417	653.567
miR-103a-3p_0_0	miR-103a-3p	AGCAGCATTGTACAGGGCTATGA		canon		2151	6007	347	2212	1366	866	2023	2153	684	1025	595	890	2205	1658	662	839	1406	1509	2657	1713	2508	1555	683	321	488	1582	559	1152	679	604	1436.63
miR-106b-3p_0_-2	miR-106b-3p	CCGCACTGTGGGTACTTGCT		3'trim		26	27	11	45	0	220	97	31	76	0	43	0	86	37	0	70	0	0	0	99	0	0	0	46	68	0	23	64	38	0	36.9
miR-106b-3p_0_-3	miR-106b-3p	CCGCACTGTGGGTACTTGC		3'trim		13	59	10	71	55	40	12	48	27	0	53	0	112	23	37	4	172	40	107	126	100	69	52	131	10	0	33	56	16	0	49.2
miR-106b-3p_0_-4	miR-106b-3p	CCGCACTGTGGGTACTTG		3'trim		48	34	46	0	7	31	5	31	131	39	69	68	87	171	202	76	42	106	49	22	88	0	29	46	104	3	42	54	39	115	59.4667
miR-106b-3p_2_-3	miR-106b-3p	TACCGCACTGTGGGTACTTGC	5'temp	3'trim		80	0	24	0	0	29	3	3	17	84	0	0	43	18	0	41	77	0	105	0	12	131	34	0	22	0	28	13	0	0	25.4667
miR-106b-5p_0_-1	miR-106b-5p	TAAAGTGCTGACAGTGCAGA		3'trim		38	29	105	0	0	193	89	200	108	0	56	0	67	176	0	6	6	137	0	0	63	0	0	0	78	141	152	154	139	34	65.7
miR-106b-5p_0_0	miR-106b-5p	TAAAGTGCTGACAGTGCAGAT		canon		40	71	35	100	0	65	0	0	69	0	29	0	50	94	3	16	0	0	0	49	0	0	0	0	9	0	66	85	87	55	30.7667
miR-106b-5p_0_1	miR-106b-5p	TAAAGTGCTGACAGTGCAGATT		3'non-temp		0	0	3	0	0	15	0	0	19	0	0	0	0	2	24	0	33	0	0	0	0	113	0	160	0	0	12	0	0	0	12.7
miR-107_0_-4	miR-107	AGCAGCATTGTACAGGGCT		3'trim		407	700	603	830	293	919	252	456	663	0	395	131	276	835	111	65	158	1007	661	303	1266	780	452	369	644	272	311	926	329	592	500.2
miR-10a-3p_0_-1	miR-10a-3p	CAAATTCGTATCTAGGGGAAT		3'trim		40	81	0	0	0	5	11	33	0	85	0	59	19	0	0	29	87	0	0	112	25	0	0	0	0	43	0	1	77	88	26.5
miR-10a-5p_-1_-1	miR-10a-5p	ACCCTGTAGATCCGAATTTGT	5'trim	3'trim		896	2498	178	2415	1695	927	1945	1482	376	1041	354	1100	1193	611	671	1505	2466	2807	5758	3557	1041	2143	1351	1813	289	1569	628	340	840	882	1479.03
miR-10a-5p_0_-1	miR-10a-5p	TACCCTGTAGATCCGAATTTGT		3'trim		3704	11992	702	13779	6736	4148	7166	7826	1412	6560	1343	5012	6568	2146	3707	5550	9460	10980	20520	14511	5332	8207	4810	5735	1263	5760	2249	1707	3636	3755	6209.2
miR-10a-5p_0_-2	miR-10a-5p	TACCCTGTAGATCCGAATTTG		3'trim		1538	5134	382	5077	3487	1943	2278	3474	797	3207	631	2336	2036	1070	1810	2446	3519	6762	12079	6516	2268	3705	1863	1918	561	1790	1320	628	1685	1782	2801.4
miR-10b-3p_-1_0	miR-10b-3p	CAGATTCGATTCTAGGGGAAT	5'trim			35	39	1	98	51	5	0	0	0	0	12	0	0	10	0	0	52	0	52	7	0	0	25	42	26	39	0	0	0	0	16.4667
miR-10b-3p_-2_0	miR-10b-3p	AGATTCGATTCTAGGGGAAT	5'trim			0	77	0	0	0	36	0	0	0	0	11	0	94	0	0	62	0	0	96	19	0	0	34	0	7	0	2	3	0	13	15.1333
miR-10b-5p_0_-1	miR-10b-5p	TACCCTGTAGAACCGAATTTGT		3'trim		4919	16778	1084	18023	7762	5336	12537	12122	2205	8835	2009	7531	6489	3557	4791	6942	11054	15603	29186	16588	7182	14755	6376	6939	1700	6496	3053	2061	3587	4614	8337.13
miR-10b-5p_0_-2	miR-10b-5p	TACCCTGTAGAACCGAATTTG		3'trim		3070	10637	667	9287	6129	3140	6951	6907	1359	5351	1291	3631	3129	2237	2660	4178	6378	9606	17605	11158	5742	7440	3654	3351	787	3698	1938	969	2032	1887	4895.63
miR-1180-3p_0_-2	miR-1180-3p	TTTCCGGCTCGCGTGGGTGT		3'trim		22	58	19	0	0	130	66	0	51	142	28	24	68	156	5	0	41	37	54	62	66	0	0	9	16	4	37	40	45	0	39.3333
miR-1180-3p_0_0	miR-1180-3p	TTTCCGGCTCGCGTGGGTGTGT		canon		0	0	10	44	0	32	154	39	34	0	28	0	11	69	13	27	42	0	0	0	0	0	21	0	0	13	15	13	0	32	19.9
miR-122-5p_0_-1	miR-122-5p	TGGAGTGTGACAATGGTGTTT		3'trim		8149	24858	1582	37235	18603	10968	15220	19017	2864	26011	7840	26842	63381	18370	8735	12175	14242	13609	19145	16401	5969	9869	11711	13931	3204	5449	3683	2867	4799	4294	14367.4
miR-122-5p_0_0	miR-122-5p	TGGAGTGTGACAATGGTGTTTG		canon		4599	16467	1181	28026	9688	7271	10161	10840	1619	14253	5077	17617	43719	12648	5611	6557	9162	8777	10535	7571	3634	5123	8131	8714	2260	3235	1993	2238	3830	2144	9089.37
miR-1226-3p_0_0	miR-1226-3p	TCACCAGCCCTGTGTTCCCTAG		canon		46	0	3	0	156	0	197	69	32	19	16	0	0	0	0	0	0	0	241	27	0	0	12	0	56	23	0	0	0	35	31.0667
miR-1228-3p_0_0	miR-1228-3p	TCACACCTGCCTCGCCCCCC		canon		0	0	3	47	1	40	70	70	0	0	19	48	0	0	1	61	23	44	0	51	0	0	0	0	0	0	24	0	27	19	18.2667
miR-1228-3p_0_1	miR-1228-3p	TCACACCTGCCTCGCCCCCCA		3'temp		48	131	0	96	641	79	533	56	24	113	15	31	119	10	66	88	113	0	0	39	74	36	22	64	21	43	48	17	0	58	86.1667
miR-1228-5p_0_0	miR-1228-5p	GTGGGCGGGGGCAGGTGTGTG		canon		88	123	26	197	76	63	550	172	13	166	12	95	265	20	95	72	60	322	447	213	0	121	34	472	39	55	72	24	94	88	135.8
miR-1229-3p_1_0	miR-1229-3p	CCTCTCACCACTGCCCTCCCACAT	5'temp		23G>T	0	0	0	0	0	0	0	0	0	0	0	0	0	0	0	0	0	0	291	0	0	0	0	0	5	24	0	0	38	0	11.9333
miR-124-3p_0_-1	miR-124-3p	TAAGGCACGCGGTGAATGC		3'trim		0	36	0	7	0	0	27	129	11	22	0	55	60	0	0	22	0	0	0	27	0	0	18	0	52	0	13	8	0	0	16.2333
miR-1246_-2_0	miR-1246	TGGATTTTTGGAGCAGG	5'trim			0	0	10	0	266	0	0	0	0	170	0	0	21	13	43	0	0	0	20	36	0	35	103	66	1	0	0	0	0	40	27.4667
miR-1247-5p_0_0	miR-1247-5p	ACCCGTCCCGTTCGTCCCCGGA		canon		20	0	2	30	32	0	5	9	0	0	11	0	48	5	0	37	0	1	0	14	18	209	0	0	0	0	42	14	87	8	19.7333
miR-1249-3p_0_-1	miR-1249-3p	ACGCCCTTCCCCCCCTTCTTC		3'trim		0	38	4	129	163	0	25	102	7	0	0	0	0	0	26	20	18	0	0	0	28	167	14	50	0	39	0	8	12	0	28.3333
miR-1249-3p_0_-2	miR-1249-3p	ACGCCCTTCCCCCCCTTCTT		3'trim		8	61	0	95	0	0	198	60	3	0	0	26	35	26	76	40	128	252	353	24	37	91	0	0	0	33	7	9	22	26	53.6667
miR-1249-3p_0_0	miR-1249-3p	ACGCCCTTCCCCCCCTTCTTCA		canon		17	56	0	204	193	31	254	99	19	387	21	40	302	88	133	132	75	45	222	140	0	406	85	0	0	90	15	36	13	37	104.667
miR-1255b-5p_0_0	miR-1255b-5p	CGGATGAGCAAAGAAAGTGGTT		canon		0	0	6	49	0	90	69	0	28	0	8	29	44	13	0	0	25	0	0	0	0	0	20	0	20	0	12	17	0	31	15.3667
miR-125a-5p_0_-1	miR-125a-5p	TCCCTGAGACCCTTTAACCTGTG		3'trim		2785	7417	335	4982	2638	1461	2398	3183	268	3226	1045	3814	2864	814	1544	2061	2581	5291	5305	4272	2018	3806	2625	3600	843	2206	1172	958	1578	1345	2614.5
miR-125a-5p_0_-2	miR-125a-5p	TCCCTGAGACCCTTTAACCTGT		3'trim		7178	18352	1422	22692	19435	7526	19357	18414	2953	15205	3642	14613	14735	4902	7230	7920	13133	25989	29948	24658	15662	21691	11410	16567	4054	9137	5059	4750	7210	8376	12774
miR-125a-5p_0_-3	miR-125a-5p	TCCCTGAGACCCTTTAACCTG		3'trim		1432	4441	316	5083	4130	1985	4297	3475	675	4920	718	3038	2392	1110	1460	2311	3083	7838	8225	6521	2764	5182	2360	3874	925	1830	1257	460	1313	1361	2959.2
miR-125b-2-3p_-2_1	miR-125b-2-3p	ACAAGTCAGGCTCTTGGGACT	5'trim	3'non-temp		0	81	3	0	0	0	73	0	0	0	0	49	0	0	0	0	32	0	132	0	18	0	0	0	1	29	0	0	0	0	13.9333
miR-125b-2-3p_-2_2	miR-125b-2-3p	ACAAGTCAGGCTCTTGGGACCT	5'trim	3'temp		13	0	0	53	0	0	8	50	12	0	6	9	0	0	13	29	0	0	93	0	0	0	47	41	0	0	9	0	0	19	13.4
miR-125b-5p_0_-2	miR-125b-5p	TCCCTGAGACCCTAACTTGT		3'trim		918	4400	385	3792	5141	1458	3134	3132	623	3025	592	2398	3658	1237	1270	2503	3175	7556	8174	7629	2992	2744	1809	3153	831	1934	1136	1080	1970	2369	2807.27
miR-125b-5p_0_-3	miR-125b-5p	TCCCTGAGACCCTAACTTG		3'trim		485	2193	179	2715	2017	675	1552	1416	228	1607	185	739	1743	622	755	806	2031	4006	6155	2559	1728	1479	1146	1732	423	878	533	510	785	760	1421.4
miR-125b-5p_0_0	miR-125b-5p	TCCCTGAGACCCTAACTTGTGA		canon		233	971	31	1756	1944	678	1113	664	156	900	205	1228	1563	578	479	767	413	2553	1799	1667	1171	294	459	1125	192	396	351	316	424	386	827.067
miR-126-3p_-1_0	miR-126-3p	CGTACCGTGAGTAATAATGCG	5'trim			6677	19571	1673	8757	4599	2462	6443	10525	1932	7697	2947	7202	6702	2482	3727	4203	8344	5545	14130	10628	3405	4677	4397	4495	2515	5352	2358	2839	2872	2090	5708.2
miR-126-3p_0_0	miR-126-3p	TCGTACCGTGAGTAATAATGCG		canon		17266	42982	2124	21578	7352	5365	15537	17157	2344	16644	4403	15614	12493	3851	6204	8511	17839	14659	31921	17957	6305	12422	7833	8251	3675	12965	4489	2727	5480	5302	11708.3
miR-126-5p_0_-1	miR-126-5p	CATTATTACTTTTGGTACGC		3'trim		55	226	10	3	0	0	139	185	5	0	11	19	67	13	0	0	21	0	0	0	62	0	29	27	31	65	25	24	51	17	36.1667
miR-126-5p_0_0	miR-126-5p	CATTATTACTTTTGGTACGCG		canon		192	182	80	153	34	43	214	452	58	399	32	102	301	89	40	180	271	35	229	193	38	175	137	54	57	99	41	39	53	19	133.033
miR-126-5p_0_1	miR-126-5p	CATTATTACTTTTGGTACGCGA		3'non-temp		21	201	15	156	0	11	5	27	6	0	0	18	160	23	27	0	0	45	29	0	32	75	0	0	30	5	0	43	57	0	32.8667
miR-126-5p_0_1	miR-126-5p	CATTATTACTTTTGGTACGCGT		3'non-temp		54	194	20	57	0	0	294	187	51	0	20	0	52	40	75	65	125	55	81	100	0	1	0	60	18	83	13	17	51	0	57.1
miR-1260a_0_2	miR-1260a	ATCCCACCGCTGCCACCAAT		3'non-temp	9T>G	83	466	30	1	0	19	217	268	77	145	5	60	188	67	39	144	180	46	387	0	0	162	15	61	16	39	2	32	19	105	95.7667
miR-1260a_0_2	miR-1260a	ATCCCACCGCTGCCACCAAA		3'temp	9T>G	160	174	18	35	45	10	278	308	47	72	5	72	219	52	39	23	68	0	150	25	9	1	104	77	39	19	58	117	124	63	80.3667
miR-1260b_0_-1	miR-1260b	ATCCCACCGCTGCCACCA		3'trim	9A>G	103	497	22	89	0	112	368	340	23	185	40	184	90	94	72	233	71	45	150	274	0	554	123	96	75	104	52	41	169	136	144.733
miR-1260b_0_0	miR-1260b	ATCCCACCGCTGCCACCAT			9A>G	594	1397	29	254	218	130	1318	803	22	13	84	246	657	88	206	203	257	560	455	297	71	1056	248	191	46	658	151	165	250	173	361.333
miR-1260b_0_1	miR-1260b	ATCCCACCGCTGCCACCATT		3'temp	9A>G	457	1124	48	366	60	184	757	255	49	434	28	211	255	73	64	225	108	356	418	181	147	483	47	233	44	203	43	59	148	132	239.733
miR-127-3p_0_1	miR-127-3p	TCGGATCCGTCTGAGCTTGGCTT		3'non-temp		19	99	6	0	0	0	46	0	10	0	35	0	21	3	0	0	0	0	200	27	0	0	0	0	0	26	0	0	0	0	16.4
miR-128-3p_0_-1	miR-128-3p	TCACAGTGAACCGGTCTCTT		3'trim		173	201	112	503	379	174	370	463	217	663	129	310	464	241	126	234	234	794	800	378	509	348	118	238	55	184	181	82	83	77	294.667
miR-128-3p_0_-2	miR-128-3p	TCACAGTGAACCGGTCTCT		3'trim		208	204	326	538	680	1061	622	344	554	293	299	196	570	820	182	284	552	964	470	560	1063	515	124	260	382	286	955	328	129	336	470.167
miR-128-3p_0_0	miR-128-3p	TCACAGTGAACCGGTCTCTTT		canon		535	1747	138	1147	413	357	1004	1282	251	675	288	942	1384	426	156	466	756	2037	1875	720	755	927	661	409	176	722	328	277	343	377	719.133
miR-1301-3p_-3_2	miR-1301-3p	CAGCTGCCTGGGAGTGACTTCAT	5'trim	3'non-temp		0	0	0	0	0	0	0	3	0	103	12	0	89	0	0	0	0	0	60	0	0	0	0	0	6	0	0	27	28	0	10.9333
miR-1301-3p_0_-6	miR-1301-3p	TTGCAGCTGCCTGGGAGT		3'trim		0	205	18	80	0	2	0	0	15	0	32	0	0	38	0	29	40	0	0	3	0	0	44	0	44	45	0	3	0	45	21.4333
miR-1301-3p_0_-7	miR-1301-3p	TTGCAGCTGCCTGGGAG		3'trim		0	39	0	0	0	0	0	0	0	0	22	0	95	35	25	0	1	0	0	0	0	0	0	0	16	35	16	0	6	26	10.5333
miR-1304-5p_3_-4	miR-1304-5p	CGGTTTGAGGCTACAGTGAGA	5'temp	3'trim		22	0	6	60	0	41	37	110	2	0	10	29	29	16	0	83	10	230	0	9	0	0	0	0	12	0	15	0	0	0	24.0333
miR-1306-5p_0_-1	miR-1306-5p	CCACCTCCCCTGCAAACGTCC		3'trim		37	46	1	192	0	43	226	145	23	1	26	29	0	38	38	4	0	20	150	90	39	242	9	0	11	27	16	6	16	19	49.8
miR-1306-5p_0_-2	miR-1306-5p	CCACCTCCCCTGCAAACGTC		3'trim		3	77	21	0	67	51	120	76	20	134	15	27	77	90	15	31	0	0	31	42	23	0	9	0	26	13	20	17	0	52	35.2333
miR-1306-5p_0_-3	miR-1306-5p	CCACCTCCCCTGCAAACGT		3'trim		12	0	8	53	0	70	86	43	48	0	29	0	7	25	32	12	11	0	0	112	76	140	20	20	0	18	47	51	0	12	31.0667
miR-1306-5p_0_0	miR-1306-5p	CCACCTCCCCTGCAAACGTCCA		canon		12	14	0	53	43	19	166	106	16	75	0	129	41	34	76	0	118	59	61	44	73	9	0	0	13	44	0	3	54	18	42.6667
miR-1307-3p_-1_1	miR-1307-3p	CTCGGCGTGGCGTCGGTCGTGG	5'trim	3'temp		4	306	10	0	0	0	50	111	15	15	3	40	92	0	92	48	70	1	122	0	0	0	86	129	17	108	18	25	103	64	50.9667
miR-1307-3p_0_1	miR-1307-3p	ACTCGGCGTGGCGTCGGTCGTGG		3'temp		34	51	3	0	59	22	83	283	22	148	21	123	205	19	69	73	180	143	27	31	55	0	0	130	34	106	11	4	85	124	71.5
miR-130a-3p_0_-1	miR-130a-3p	CAGTGCAATGTTAAAAGGGCA		3'trim		7	22	63	28	0	33	13	28	55	0	130	63	28	128	1	13	12	0	204	28	87	0	3	0	127	39	43	178	29	0	45.4
miR-130a-3p_0_-2	miR-130a-3p	CAGTGCAATGTTAAAAGGGC		3'trim		27	21	3	0	0	0	0	0	10	0	0	42	59	23	2	0	36	0	50	34	0	0	0	0	0	0	0	7	0	6	10.6667
miR-130b-3p_0_-1	miR-130b-3p	CAGTGCAATGATGAAAGGGCA		3'trim		77	26	53	0	0	121	0	0	31	0	125	53	0	94	10	25	68	68	58	38	200	107	68	34	40	61	109	26	46	3	51.3667
miR-130b-3p_0_-2	miR-130b-3p	CAGTGCAATGATGAAAGGGC		3'trim		0	0	0	0	0	0	77	56	12	53	0	25	0	0	0	20	18	194	0	0	0	0	45	0	0	12	0	0	0	7	17.3
miR-130b-3p_0_-3	miR-130b-3p	CAGTGCAATGATGAAAGGG		3'trim		0	25	2	0	0	0	33	73	6	0	0	14	0	5	0	0	16	0	0	31	57	0	0	17	2	18	0	19	9	0	10.9
miR-130b-5p_0_-1	miR-130b-5p	ACTCTTTCCCTGTTGCACTA		3'trim		40	52	19	94	0	87	130	75	21	104	27	54	37	80	39	79	113	0	85	0	46	0	43	46	32	105	60	49	117	80	57.1333
miR-130b-5p_0_-2	miR-130b-5p	ACTCTTTCCCTGTTGCACT		3'trim		66	218	20	82	50	51	137	136	38	0	50	119	113	130	22	10	69	15	159	67	25	0	65	222	65	90	9	120	48	11	73.5667
miR-130b-5p_0_0	miR-130b-5p	ACTCTTTCCCTGTTGCACTAC		canon		52	265	3	91	0	0	125	141	16	0	13	93	69	34	0	32	92	0	301	97	22	142	9	25	0	168	16	29	61	36	64.4
miR-130b-5p_0_1	miR-130b-5p	ACTCTTTCCCTGTTGCACTACT		3'temp		492	663	25	82	196	53	141	352	23	270	47	184	603	79	185	112	93	173	159	141	171	907	102	196	39	519	25	61	17	86	206.533
miR-132-3p_0_0	miR-132-3p	TAACAGTCTACAGCCATGGTCG		canon		48	42	5	152	0	0	25	78	12	0	19	0	0	26	54	52	0	0	1	0	0	0	0	0	30	0	0	17	50	51	22.0667
miR-134-5p_0_0	miR-134-5p	TGTGACTGGTTGACCAGAGGGG		canon		51	138	7	0	50	0	0	0	1	57	17	9	0	32	3	18	37	0	146	0	0	0	0	0	0	0	0	0	0	0	18.8667
miR-134-5p_0_1	miR-134-5p	TGTGACTGGTTGACCAGAGGGGT		3'non-temp		26	0	0	0	0	0	137	0	0	98	25	27	0	0	0	0	0	0	0	1	0	73	0	0	0	17	13	0	0	0	13.9
miR-139-3p_0_-1	miR-139-3p	TGGAGACGCGGCCCTGTTGGAG		3'trim		11	148	6	330	50	0	234	68	5	0	23	0	0	64	2	23	76	34	65	60	0	0	28	157	2	21	0	0	12	9	47.6
miR-139-3p_0_0	miR-139-3p	TGGAGACGCGGCCCTGTTGGAGT		canon		45	121	10	0	365	111	2	4	2	355	59	46	137	18	36	92	261	108	61	64	32	358	152	172	105	140	82	28	42	64	102.4
miR-139-5p_0_-1	miR-139-5p	TCTACAGTGCACGTGTCTCCAG		3'trim		174	474	19	455	174	159	60	228	112	0	44	187	167	20	185	216	177	269	337	250	134	717	127	194	27	145	49	231	131	197	188.633
miR-139-5p_0_-2	miR-139-5p	TCTACAGTGCACGTGTCTCCA		3'trim		331	272	23	112	42	50	68	190	61	174	18	0	139	80	131	90	183	344	202	370	70	244	0	41	26	46	0	166	110	91	122.467
miR-139-5p_0_0	miR-139-5p	TCTACAGTGCACGTGTCTCCAGT		canon		760	1349	77	617	238	101	1004	457	93	605	116	357	395	130	102	340	642	79	930	353	0	573	428	680	75	438	230	299	288	455	407.033
miR-140-3p_-1_1	miR-140-3p	ACCACAGGGTAGAACCACGGA	5'trim	3'temp		45	149	119	402	60	132	64	66	137	82	151	146	115	246	0	52	420	451	184	57	48	340	56	21	65	131	90	110	94	22	135.167
miR-140-3p_0_0	miR-140-3p	TACCACAGGGTAGAACCACGG		canon		202	278	73	17	280	98	74	94	84	0	75	202	221	80	149	58	236	343	500	151	399	42	59	71	113	145	79	93	39	68	144.1
miR-140-3p_0_1	miR-140-3p	TACCACAGGGTAGAACCACGGA		3'temp		127	230	92	152	34	312	104	379	179	0	305	36	171	290	144	14	154	258	198	142	258	276	107	237	209	396	170	202	53	76	176.833
miR-140-5p_-1_0	miR-140-5p	AGTGGTTTTACCCTATGGTAG	5'trim			0	0	0	23	0	0	181	149	13	0	11	0	0	0	0	0	18	62	0	0	0	0	0	18	19	18	24	10	0	17	18.7667
miR-140-5p_0_0	miR-140-5p	CAGTGGTTTTACCCTATGGTAG		canon		122	402	4	97	157	28	32	115	54	0	23	0	262	97	26	10	45	0	5	53	0	256	18	49	49	35	49	49	59	8	70.1333
miR-140-5p_0_1	miR-140-5p	CAGTGGTTTTACCCTATGGTAGT		3'non-temp		0	142	0	0	2	0	93	72	0	0	9	25	40	0	0	138	69	0	0	71	0	0	0	0	3	9	32	9	0	45	25.3
miR-141-3p_0_-1	miR-141-3p	TAACACTGTCTGGTAAAGATG		3'trim		0	0	15	0	0	0	15	50	0	0	0	30	162	0	33	22	60	0	59	0	49	0	23	0	0	0	0	0	0	11	17.6333
miR-142-3p_-1_0	miR-142-3p	GTAGTGTTTCCTACTTTATGGA	5'trim			26	322	18	0	0	0	0	0	0	106	0	63	169	56	0	10	0	0	108	0	130	97	37	0	10	23	0	36	127	85	47.4333
miR-142-3p_0_0	miR-142-3p	TGTAGTGTTTCCTACTTTATGGA		canon		106	279	13	0	0	0	72	135	1	0	0	13	66	71	0	40	46	0	29	0	0	83	0	38	20	30	0	26	20	51	37.9667
miR-142-3p_0_0	miR-142-3p	TGTAGTGTTTCCTACTTTATGGT			23A>T	37	235	0	0	0	0	129	102	2	0	0	60	86	0	0	10	11	0	40	0	0	26	0	0	0	0	0	0	90	11	27.9667
miR-142-5p_2_-3	miR-142-5p	CCCATAAAGTAGAAAGCACT	5'temp	3'trim		2584	6192	2497	4112	1728	2947	5744	5515	3264	5131	3159	4134	3491	4186	2026	2691	7042	3506	6664	6391	4263	8376	3663	2683	2524	3802	4039	2348	1906	1742	3945
miR-143-3p_0_-1	miR-143-3p	TGAGATGAAGCACTGTAGCT		3'trim		1805	4302	379	5306	4207	1576	7056	8859	1224	4352	1289	3730	5135	1251	2859	3540	5636	4520	8364	6234	4397	8670	4841	4986	1789	5027	2242	1753	3099	2482	4030.33
miR-143-3p_0_0	miR-143-3p	TGAGATGAAGCACTGTAGCTC		canon		4877	10948	688	9921	8827	3307	16253	16352	2400	9489	2068	6301	13886	3945	5850	6051	12899	14256	21315	18004	10481	15463	10840	10978	3847	11873	3689	3583	6051	4107	8951.63
miR-143-3p_0_1	miR-143-3p	TGAGATGAAGCACTGTAGCTCT		3'non-temp		4756	9972	713	11433	10953	3552	18037	18094	2250	8744	2617	9382	14030	4337	6128	5675	10613	13568	20143	17914	13402	23400	10765	11457	4139	14286	4171	4097	7281	4852	9692.03
miR-143-5p_0_0	miR-143-5p	GGTGCAGTGCTGCATCTCTGGT		canon		1	107	1	0	0	0	58	256	5	0	0	0	114	14	23	66	0	0	0	0	0	0	0	54	0	0	0	0	0	0	23.3
miR-144-3p_0_-1	miR-144-3p	TACAGTATAGATGATGTAC		3'trim		120	0	161	53	0	410	152	123	163	0	68	77	98	408	90	68	242	37	120	53	49	161	47	94	96	50	253	179	201	123	123.2
miR-144-3p_0_0	miR-144-3p	TACAGTATAGATGATGTACT		canon		49	198	167	44	0	152	236	144	146	70	70	168	150	604	173	204	251	42	96	26	57	0	80	109	119	33	163	461	128	95	141.167
miR-144-5p_-1_2	miR-144-5p	GATATCATCATATACTGTAAGTT	5'trim	3'temp		212	166	122	71	0	162	241	153	193	0	249	90	106	387	48	165	147	357	112	176	469	1	140	110	169	194	202	286	85	136	164.967
miR-144-5p_0_0	miR-144-5p	GGATATCATCATATACTGTAAG		canon		89	181	47	85	0	34	118	235	17	265	104	123	133	21	170	221	209	9	164	254	352	0	21	119	90	51	12	8	99	39	109
miR-144-5p_0_1	miR-144-5p	GGATATCATCATATACTGTAAGT		3'temp		387	988	96	820	27	90	229	386	126	356	251	344	374	140	65	321	657	44	1055	336	96	167	148	227	68	248	143	64	21	54	277.6
miR-145-3p_-1_0	miR-145-3p	GATTCCTGGAAATACTGTTCT	5'trim			12	55	0	107	78	60	10	44	16	0	12	42	30	7	140	24	56	570	258	109	134	248	116	71	0	63	0	56	153	80	85.0333
miR-145-3p_-2_0	miR-145-3p	ATTCCTGGAAATACTGTTCT	5'trim			56	154	16	356	217	38	176	313	24	378	5	154	39	62	47	28	89	304	202	872	89	345	276	296	47	201	21	72	101	59	167.9
miR-145-3p_-2_1	miR-145-3p	ATTCCTGGAAATACTGTTCTT	5'trim	3'temp		14	283	11	165	357	66	264	279	5	292	10	227	277	19	41	150	375	790	327	421	190	410	321	350	0	183	112	42	155	90	207.533
miR-145-5p_0_-1	miR-145-5p	GTCCAGTTTTCCCAGGAATCCC		3'trim		12	114	4	21	194	70	146	46	6	0	0	26	310	34	12	1	79	208	126	214	31	6	78	58	28	187	79	24	43	0	71.9
miR-145-5p_0_-2	miR-145-5p	GTCCAGTTTTCCCAGGAATCC		3'trim		7	106	3	102	341	20	21	85	14	229	0	50	252	13	41	113	28	63	82	86	54	171	143	0	15	44	26	62	139	59	78.9667
miR-145-5p_0_0	miR-145-5p	GTCCAGTTTTCCCAGGAATCCCT		canon		0	17	3	39	0	0	89	161	3	0	0	20	137	0	5	3	8	177	80	179	51	0	69	0	0	25	10	76	44	18	40.4667
miR-1468-5p_0_0	miR-1468-5p	CTCCGTTTGCCTGTTTCGCTG		canon		8	0	0	27	0	0	45	107	5	0	11	65	0	0	0	8	29	0	0	46	0	133	0	0	0	37	0	0	15	0	17.8667
miR-1468-5p_0_1	miR-1468-5p	CTCCGTTTGCCTGTTTCGCTGA		3'temp		43	95	0	0	0	32	100	84	0	7	0	0	98	15	2	0	8	38	72	0	0	0	0	0	0	0	2	7	51	23	22.5667
miR-146a-5p_0_-1	miR-146a-5p	TGAGAACTGAATTCCATGGGT		3'trim		4316	13379	1228	4941	4612	1206	5533	6340	1323	7978	2552	6919	7264	3505	4721	7086	10372	8226	13044	8103	3870	9629	9815	16502	3748	7059	3665	1953	3016	1963	6128.93
miR-146a-5p_0_0	miR-146a-5p	TGAGAACTGAATTCCATGGGTT		canon		5595	18180	940	10808	7237	2293	6146	8329	601	6793	1684	4861	8792	2902	4463	6857	8356	5963	12527	6991	2879	7417	9087	11911	2703	9300	2922	2522	4051	3322	6214.4
miR-146b-3p_-1_-1	miR-146b-3p	GCCCTGTGGACTCAGTTCTG	5'trim	3'trim		0	0	0	0	0	0	0	0	0	0	0	0	106	31	33	40	0	0	107	85	0	0	32	0	28	0	0	18	0	0	16
miR-146b-3p_-1_0	miR-146b-3p	GCCCTGTGGACTCAGTTCTGG	5'trim			34	233	5	45	146	60	1	3	23	0	50	0	51	19	0	8	57	64	0	28	1	4	0	41	32	75	0	0	0	28	33.6
miR-146b-3p_-1_1	miR-146b-3p	GCCCTGTGGACTCAGTTCTGGT	5'trim	3'temp		0	47	6	0	0	0	0	0	0	0	0	17	0	25	90	0	0	178	61	0	0	0	10	0	0	36	0	19	0	5	16.4667
miR-146b-3p_0_0	miR-146b-3p	TGCCCTGTGGACTCAGTTCTGG		canon		0	0	0	0	0	18	76	0	0	0	0	0	0	8	0	0	60	0	0	0	0	103	19	2	0	60	6	0	0	0	11.7333
miR-146b-5p_0_0	miR-146b-5p	TGAGAACTGAATTCCATAGGCT		canon		471	1194	90	379	351	348	861	600	194	610	205	690	764	418	566	650	837	711	1221	1446	344	1103	1998	1651	361	891	555	302	469	245	684.167
miR-146b-5p_0_1	miR-146b-5p	TGAGAACTGAATTCCATAGGCTG		3'temp		236	660	66	365	129	140	566	539	93	371	127	428	542	431	225	283	722	693	697	1058	578	350	817	1425	91	527	155	191	166	169	428
miR-146b-5p_0_2	miR-146b-5p	TGAGAACTGAATTCCATAGGCTGT		3'temp		899	2072	90	1636	359	177	891	1147	90	1004	181	166	704	438	632	695	894	1160	1570	925	698	1257	1371	994	168	1054	375	260	244	317	748.933
miR-148a-3p_0_-1	miR-148a-3p	TCAGTGCACTACAGAACTTTG		3'trim		328	855	263	456	564	258	1119	655	168	333	239	756	975	483	263	356	473	151	884	295	271	1110	649	380	55	240	488	270	315	215	462.233
miR-148a-3p_0_0	miR-148a-3p	TCAGTGCACTACAGAACTTTGT		canon		3142	6725	592	4384	2629	919	4238	5436	1004	4832	1738	4044	5966	2250	2174	1847	3536	888	6175	2789	1442	3355	2107	2853	860	3330	1959	1112	1359	950	2821.17
miR-148b-3p_0_-1	miR-148b-3p	TCAGTGCATCACAGAACTTTG		3'trim		51	179	53	0	85	40	0	0	68	0	151	187	23	91	44	65	41	1	0	115	28	0	0	86	82	0	110	112	52	103	58.9
miR-148b-3p_0_0	miR-148b-3p	TCAGTGCATCACAGAACTTTGT		canon		594	1672	94	412	97	141	480	537	181	0	218	232	632	250	189	298	550	295	750	26	210	442	157	607	219	524	297	161	353	143	358.7
miR-148b-3p_0_1	miR-148b-3p	TCAGTGCATCACAGAACTTTGTT		3'non-temp		304	745	39	270	64	26	84	139	3	188	74	150	110	32	34	49	57	47	143	67	0	303	74	164	17	219	6	59	0	21	116.267
miR-150-3p_0_-1	miR-150-3p	CTGGTACAGGCCTGGGGGACA		3'trim		0	398	16	35	117	22	95	36	0	0	49	137	224	53	161	74	197	95	120	421	35	339	22	257	10	15	29	63	130	0	105
miR-150-3p_0_-1	miR-150-3p	CTGGTACAGGCCTGGGGGACT		3'trim	21A>T	50	66	0	0	0	0	1	9	0	0	9	0	0	0	57	0	0	55	0	21	0	0	0	54	31	53	87	0	0	57	18.3333
miR-150-3p_0_-2	miR-150-3p	CTGGTACAGGCCTGGGGGAC		3'trim		65	60	0	150	0	0	0	0	7	0	0	40	61	0	12	0	55	68	23	61	0	0	7	0	12	38	14	2	14	26	23.8333
miR-150-5p_0_-1	miR-150-5p	TCTCCCAACCCTTGTACCAGT		3'trim		3455	9621	680	4391	4763	2015	8223	4919	1047	6495	746	4639	5646	3797	3407	4413	5196	16738	7703	9839	6198	18758	7236	7548	2469	4475	2312	4176	4884	7216	5766.83
miR-150-5p_0_-2	miR-150-5p	TCTCCCAACCCTTGTACCAG		3'trim		3241	6637	477	3592	4647	1422	6427	6118	725	6716	978	4901	3750	3009	3540	3443	5296	13870	7372	10055	5638	17549	6351	8429	2292	4123	2028	1766	2148	3529	5002.3
miR-150-5p_0_0	miR-150-5p	TCTCCCAACCCTTGTACCAGTG		canon		7747	19533	1117	9200	9380	3753	14435	12117	1999	14298	2227	10980	9453	7366	6851	7338	12531	32810	16880	18910	11966	29997	12182	14384	3682	8478	4086	10384	11367	15783	11374.5
miR-151a-3p_0_0	miR-151a-3p	CTAGACTGAAGCTCCTTGAGG		canon		1138	3425	147	2127	533	425	1219	1597	346	1553	551	736	2057	690	666	989	1945	1674	1902	1275	827	939	916	1326	565	1797	697	455	946	380	1128.1
miR-151a-3p_0_1	miR-151a-3p	CTAGACTGAAGCTCCTTGAGGA		3'temp		1124	2068	232	1267	1026	357	1506	964	389	1016	566	1213	1289	910	437	820	1545	1353	2324	741	1085	1757	678	1019	406	1914	423	521	358	288	986.533
miR-151a-5p@_0_-1	miR-151a-5p@	TCGAGGAGCTCACAGTCTAG		3'trim		157	221	133	68	368	325	492	390	188	273	156	255	516	312	40	68	340	597	115	202	2	0	142	117	313	232	252	208	79	25	219.533
miR-151a-5p@_0_0	miR-151a-5p@	TCGAGGAGCTCACAGTCTAGT		canon		2783	4822	296	2349	1213	522	2104	3213	487	1715	1161	1549	2207	963	768	1526	1848	1101	4134	880	1122	807	2106	1711	631	2726	337	965	550	1002	1586.6
miR-152-3p_0_0	miR-152-3p	TCAGTGCATGACAGAACTTGG		canon		79	133	5	0	0	6	32	98	11	157	21	2	147	112	126	73	50	102	36	66	82	0	83	0	80	25	0	4	30	135	56.5
miR-152-3p_0_1	miR-152-3p	TCAGTGCATGACAGAACTTGGG		3'temp		4	131	7	51	0	0	187	0	9	0	0	0	19	15	0	0	17	0	0	0	0	0	1	93	2	36	0	41	0	0	20.4333
miR-152-3p_0_2	miR-152-3p	TCAGTGCATGACAGAACTTGGGT		3'non-temp		109	209	2	0	0	0	60	226	0	0	0	79	190	40	57	7	81	0	167	132	0	0	35	0	94	45	47	108	26	84	59.9333
miR-155-5p_0_-1	miR-155-5p	TTAATGCTAATCGTGATAGGGA		3'trim	22G>A	0	7	2	0	4	0	30	96	12	0	0	19	38	0	46	1	0	325	0	0	0	330	15	29	0	31	0	9	17	9	34
miR-155-5p_0_-2	miR-155-5p	TTAATGCTAATCGTGATAGGG		3'trim		75	16	7	0	69	0	15	57	15	0	37	87	51	8	34	67	66	335	0	49	232	0	16	89	0	32	61	65	16	30	50.9667
miR-15a-5p_0_-1	miR-15a-5p	TAGCAGCACATAATGGTTTGT		3'trim		40	218	150	32	137	95	189	286	268	149	237	116	54	271	80	47	196	366	387	499	69	5	54	1	154	162	146	453	369	106	177.867
miR-15a-5p_0_-2	miR-15a-5p	TAGCAGCACATAATGGTTTG		3'trim		93	0	110	103	0	64	41	120	113	263	39	0	0	249	0	0	43	0	112	165	295	0	68	0	105	48	81	241	187	146	89.5333
miR-15b-3p_0_-3	miR-15b-3p	CGAATCATTATTTGCTGCT		3'trim		21	0	11	0	0	28	44	0	3	0	0	0	0	43	18	0	53	0	0	100	19	0	0	0	32	22	0	38	7	10	14.9667
miR-15b-5p_0_-1	miR-15b-5p	TAGCAGCACATCATGGTTTAC		3'trim		291	604	160	337	49	54	229	539	138	54	36	85	233	79	170	62	263	244	477	446	10	26	246	0	25	263	254	242	145	174	197.833
miR-15b-5p_0_-2	miR-15b-5p	TAGCAGCACATCATGGTTTA		3'trim		195	412	172	184	119	165	413	97	281	0	31	87	56	281	91	51	177	172	91	344	239	265	36	117	142	118	431	620	113	308	193.6
miR-15b-5p_0_-3	miR-15b-5p	TAGCAGCACATCATGGTTT		3'trim		476	876	637	378	376	949	925	572	1235	484	663	262	717	977	257	105	683	853	683	166	937	68	141	104	570	356	1114	1662	555	705	616.2
miR-15b-5p_0_-4	miR-15b-5p	TAGCAGCACATCATGGTT		3'trim		833	571	854	253	92	795	535	486	1213	0	343	271	202	1058	384	127	343	384	657	779	964	1131	269	81	824	58	776	670	234	699	529.533
miR-16-2-3p_1_-1	miR-16-2-3p	ACCAATATTACTGTGCTGCTTT	5'temp	3'trim		965	1263	725	499	700	1357	1323	648	1278	482	720	694	612	1470	430	354	1051	1096	175	462	1077	1020	723	352	553	456	1463	733	414	812	796.9
miR-16-2-3p_1_-2	miR-16-2-3p	ACCAATATTACTGTGCTGCTT	5'temp	3'trim		721	434	1164	355	703	1826	1262	1375	1707	554	835	377	504	2081	498	599	392	649	663	560	1530	926	305	238	1281	497	1010	973	256	433	823.6
miR-16-2-3p_1_-3	miR-16-2-3p	ACCAATATTACTGTGCTGCT	5'temp	3'trim		546	420	592	375	25	220	253	122	469	211	345	172	82	778	303	95	250	216	185	240	578	104	258	7	954	117	410	358	234	164	302.767
miR-16-5p_0_0	miR-16-5p	TAGCAGCACGTAAATATTGGCG		canon		63699	73448	59824	58118	21851	111954	64621	69342	88605	30192	53072	29088	57992	88612	39340	28140	55466	72518	77993	60343	118942	32128	19904	13341	42020	40261	75556	110524	43527	48337	58291.9
miR-17-5p_0_0	miR-17-5p	CAAAGTGCTTACAGTGCAGGTAG		canon		44	94	29	0	0	0	27	85	22	0	27	0	37	20	0	0	0	0	57	0	0	0	14	25	40	0	0	188	17	43	25.6333
miR-181a-2-3p_0_-1	miR-181a-2-3p	ACCACTGACCGTTGACTGTAC		3'trim		205	475	23	284	0	22	454	403	20	0	67	257	152	87	85	65	173	188	151	113	226	0	101	217	16	133	120	76	141	0	141.8
miR-181a-2-3p_0_-2	miR-181a-2-3p	ACCACTGACCGTTGACTGTA		3'trim		66	56	25	92	53	0	26	114	37	138	25	0	46	43	0	19	115	0	66	101	97	0	175	88	41	0	18	13	64	44	52.0667
miR-181a-2-3p_0_-3	miR-181a-2-3p	ACCACTGACCGTTGACTGT		3'trim		3	168	25	9	0	151	57	20	51	0	0	103	24	80	81	41	71	210	332	80	202	0	26	80	59	79	31	76	68	32	71.9667
miR-181a-3p_0_-3	miR-181a-3p	ACCATCGACCGTTGATTGT		3'trim		0	14	0	0	0	0	31	107	0	0	0	0	0	0	0	0	0	0	72	51	0	122	46	0	0	26	0	0	0	27	16.5333
miR-181a-5p_0_-1	miR-181a-5p	AACATTCAACGCTGTCGGTGAG		3'trim		462	1503	108	581	1235	455	749	1327	352	310	585	520	1148	794	817	683	1322	1055	1366	1671	956	961	606	684	500	604	286	680	594	644	785.267
miR-181a-5p_0_-2	miR-181a-5p	AACATTCAACGCTGTCGGTGA		3'trim		1489	4458	656	5165	4821	2039	4277	4078	1224	2686	1179	2328	2615	2046	1573	2769	3298	5583	4850	4860	2658	5270	3510	4211	1369	2598	1679	1771	2470	1432	2965.4
miR-181a-5p_0_-3	miR-181a-5p	AACATTCAACGCTGTCGGTG		3'trim		688	2228	253	1146	891	532	1632	1713	343	721	194	904	1109	799	829	1153	1517	1368	2225	1625	719	1535	1475	1131	828	909	586	378	508	582	1017.37
miR-181a-5p_0_0	miR-181a-5p	AACATTCAACGCTGTCGGTGAGT		canon		580	1809	154	1556	1699	257	1246	1276	208	922	437	758	1661	672	576	713	1279	2454	1360	1416	374	1997	1011	799	434	676	298	628	762	493	950.167
miR-181b-5p_0_-2	miR-181b-5p	AACATTCATTGCTGTCGGTGG		3'trim		69	356	73	251	236	154	260	501	66	88	50	290	258	119	209	249	333	194	415	507	108	193	185	212	54	140	70	91	157	140	200.933
miR-181b-5p_0_-3	miR-181b-5p	AACATTCATTGCTGTCGGTG		3'trim		33	111	13	83	310	17	285	241	3	0	91	25	84	31	28	146	74	228	171	97	0	0	140	224	96	77	49	0	14	68	91.3
miR-181b-5p_0_0	miR-181b-5p	AACATTCATTGCTGTCGGTGGGT		canon		10	322	19	119	222	88	87	91	29	0	29	14	137	48	234	218	182	166	189	227	0	10	169	136	17	58	26	85	101	8	101.367
miR-181c-5p_0_0	miR-181c-5p	AACATTCAACCTGTCGGTGAGT		canon		17	49	5	0	82	17	0	0	9	0	6	0	0	0	7	21	32	0	34	0	0	0	11	0	4	27	0	0	55	47	14.1
miR-181c-5p_0_1	miR-181c-5p	AACATTCAACCTGTCGGTGAGTT		3'temp		8	0	2	0	0	0	18	59	0	0	0	0	47	0	0	16	0	55	0	0	0	0	0	176	0	0	21	16	46	0	15.4667
miR-181d-5p_0_0	miR-181d-5p	AACATTCATTGTTGTCGGTGGGT		canon		0	20	1	80	0	0	1	3	0	141	0	0	0	0	0	0	0	39	105	0	0	0	0	0	0	19	0	4	7	0	14
miR-182-5p_0_-6	miR-182-5p	TTTGGCAATGGTAGAACT		3'trim		38	73	59	0	0	35	56	207	38	0	32	0	83	179	0	0	122	0	66	0	0	0	0	0	23	35	46	65	0	0	38.5667
miR-183-5p_-1_0	miR-183-5p	ATGGCACTGGTAGAATTCACT	5'trim			34	0	9	0	0	0	20	82	61	0	43	0	0	190	56	0	48	0	0	0	179	0	0	0	15	72	19	7	1	42	29.2667
miR-183-5p_0_-3	miR-183-5p	TATGGCACTGGTAGAATTC		3'trim		20	0	22	88	284	143	0	0	52	0	28	0	40	38	92	0	0	0	0	0	0	0	0	0	10	0	56	97	18	39	34.2333
miR-183-5p_0_-4	miR-183-5p	TATGGCACTGGTAGAATT		3'trim		7	0	28	0	0	27	19	62	39	0	0	0	0	88	16	7	57	177	48	0	43	0	15	142	13	39	173	19	41	8	35.6
miR-183-5p_0_0	miR-183-5p	TATGGCACTGGTAGAATTCACT		canon		0	82	3	0	0	0	21	47	20	0	0	0	318	14	0	11	13	0	238	0	188	0	0	0	0	0	0	10	0	0	32.1667
miR-185-3p_0_-1	miR-185-3p	AGGGGCTGGCTTTCCTCTGGT		3'trim		9	225	17	0	90	0	41	165	35	0	3	0	10	112	50	41	63	19	15	0	20	6	26	0	37	34	29	51	0	0	36.6
miR-185-3p_0_0	miR-185-3p	AGGGGCTGGCTTTCCTCTGGTT			22C>T	0	35	4	0	0	0	52	0	0	0	0	0	0	59	0	21	11	0	0	0	0	0	29	0	19	42	38	38	28	0	12.5333
miR-185-3p_0_0	miR-185-3p	AGGGGCTGGCTTTCCTCTGGTA			22C>A	4	35	18	30	0	39	18	81	36	0	59	46	63	133	0	2	63	0	74	0	135	0	0	0	65	31	72	6	0	0	33.6667
miR-185-5p_0_0	miR-185-5p	TGGAGAGAAAGGCAGTTCCTGA		canon		575	845	536	767	409	630	1453	1505	846	462	1090	631	1189	2299	567	471	639	869	1245	544	1355	344	329	443	562	424	1237	1091	755	316	814.267
miR-186-5p_0_0	miR-186-5p	CAAAGAATTCTCCTTTTGGGCT		canon		1423	3170	1270	2203	1523	1153	5226	3473	1531	3209	1736	2325	3861	4374	1339	1980	3333	3626	4132	2583	3091	6115	2036	2827	1374	1603	1998	2111	2174	1204	2600.1
miR-186-5p_0_1	miR-186-5p	CAAAGAATTCTCCTTTTGGGCTT		3'temp		601	1971	95	1045	608	121	1284	1226	65	542	253	620	1361	326	264	624	1346	873	1363	795	412	1866	580	1216	127	875	250	312	759	249	734.3
miR-18a-3p_0_-1	miR-18a-3p	ACTGCCCTAAGTGCTCCTTCTG		3'trim		1	0	1	0	0	56	81	55	55	0	6	0	0	104	4	0	58	19	0	0	2	0	0	0	13	20	30	6	62	57	21
miR-18a-3p_0_0	miR-18a-3p	ACTGCCCTAAGTGCTCCTTCTGT			23G>T	29	59	1	0	109	0	0	0	0	0	0	22	0	0	0	0	0	3	0	0	100	0	0	0	0	0	10	0	0	12	11.5
miR-18a-5p_0_-1	miR-18a-5p	TAAGGTGCATCTAGTGCAGATA		3'trim		14	0	32	203	0	42	52	166	50	98	21	0	0	117	0	0	18	0	143	0	0	0	0	0	23	0	0	74	90	45	39.6
miR-18a-5p_0_-2	miR-18a-5p	TAAGGTGCATCTAGTGCAGAT		3'trim		6	0	9	0	0	0	0	2	48	0	16	0	0	21	0	10	33	0	0	37	35	0	82	0	50	1	0	0	22	3	12.5
miR-18a-5p_0_0	miR-18a-5p	TAAGGTGCATCTAGTGCAGATAG		canon		0	5	22	0	0	0	13	36	19	0	0	0	9	0	26	0	0	0	0	0	0	0	0	73	1	0	65	77	0	0	11.5333
miR-1908-5p_0_-1	miR-1908-5p	CGGCGGGGACGGCGATTGGT		3'trim		17	437	22	124	0	59	121	250	88	76	14	14	127	146	0	121	0	247	200	6	149	0	71	0	79	27	3	30	23	9	82
miR-1908-5p_0_-2	miR-1908-5p	CGGCGGGGACGGCGATTGG		3'trim		0	0	0	0	0	8	12	67	20	0	32	41	0	42	0	0	0	0	0	0	0	0	26	94	0	0	24	0	0	0	12.2
miR-1908-5p_0_0	miR-1908-5p	CGGCGGGGACGGCGATTGGTC		canon		65	73	0	0	53	0	22	51	7	71	0	0	96	8	0	0	0	0	0	0	0	0	0	80	0	0	0	10	0	0	17.8667
miR-191-3p_-1_0	miR-191-3p	CTGCGCTTGGATTTCGTCCCC	5'trim			8	76	0	0	0	0	0	0	0	0	0	10	0	0	0	0	0	0	125	0	123	0	0	0	0	53	0	0	0	22	13.9
miR-191-3p_0_-2	miR-191-3p	GCTGCGCTTGGATTTCGTCC		3'trim		0	31	0	0	148	0	0	0	0	0	0	0	0	0	0	13	0	0	132	87	0	0	0	36	0	25	47	0	0	0	17.3
miR-191-3p_0_0	miR-191-3p	GCTGCGCTTGGATTTCGTCCCC		canon		27	28	0	22	0	22	0	0	8	0	0	0	0	14	44	37	0	0	0	0	0	103	0	0	0	0	0	0	0	0	10.1667
miR-191-5p_-1_-1	miR-191-5p	AACGGAATCCCAAAAGCAGCT	5'trim	3'trim		312	1111	193	550	362	218	454	632	310	548	558	708	672	497	409	229	544	797	510	762	537	823	302	579	529	411	192	286	327	292	488.467
miR-191-5p_0_-1	miR-191-5p	CAACGGAATCCCAAAAGCAGCT		3'trim		2035	5062	456	2937	2478	812	3350	2659	734	2158	1599	1789	3338	1584	1330	1246	2460	3398	2690	1698	1894	3305	1322	2103	1065	2669	537	1200	1184	833	1997.5
miR-191-5p_0_0	miR-191-5p	CAACGGAATCCCAAAAGCAGCTG		canon		1148	3427	287	894	1177	478	1503	1852	345	1078	544	800	2015	839	527	588	1049	896	1873	1153	712	401	766	670	379	1631	357	542	801	462	973.133
miR-192-5p_-1_0	miR-192-5p	TGACCTATGAATTGACAGCC	5'trim			319	596	254	12	0	204	830	425	290	222	295	496	1099	775	282	289	375	260	564	399	66	564	361	104	293	375	294	533	237	221	367.8
miR-192-5p_-1_1	miR-192-5p	TGACCTATGAATTGACAGCCA	5'trim	3'temp		422	679	152	936	226	252	847	541	392	774	534	806	643	1160	297	672	930	317	1309	354	789	766	478	339	317	410	524	331	264	196	555.233
miR-192-5p_-1_2	miR-192-5p	TGACCTATGAATTGACAGCCAG	5'trim	3'temp		120	370	89	241	393	62	404	318	125	207	272	542	294	224	77	102	258	116	349	265	64	202	277	197	105	299	119	95	79	81	211.533
miR-193a-5p_0_-1	miR-193a-5p	TGGGTCTTTGCGGGCGAGATG		3'trim		78	110	13	119	50	53	164	85	38	0	72	350	333	46	45	156	86	177	39	156	150	0	46	64	26	0	32	54	50	55	88.2333
miR-193a-5p_0_-2	miR-193a-5p	TGGGTCTTTGCGGGCGAGAT		3'trim		25	192	4	51	0	0	114	0	31	107	23	72	83	0	46	45	112	226	0	118	1	79	11	43	35	105	42	30	0	84	55.9667
miR-193a-5p_0_0	miR-193a-5p	TGGGTCTTTGCGGGCGAGATGA		canon		176	352	37	596	141	335	508	279	35	326	298	301	670	244	389	257	153	203	187	207	404	0	181	252	141	254	195	125	324	130	256.667
miR-193b-3p_0_-6	miR-193b-3p	AACTGGCCCTCAAAGT		3'trim		59	47	1	0	65	0	93	292	19	288	33	86	0	21	8	18	17	52	0	16	0	1	47	110	6	0	16	41	0	15	45.0333
miR-194-5p_0_-1	miR-194-5p	TGTAACAGCAACTCCATGTGG		3'trim		759	1528	247	788	474	137	493	781	427	1172	607	1391	1509	855	893	1132	1240	518	945	877	772	550	798	318	170	818	703	341	223	469	731.167
miR-195-5p_0_0	miR-195-5p	TAGCAGCACAGAAATATTGGC		canon		7	0	5	0	0	0	11	29	9	0	17	0	0	0	24	97	0	84	0	271	0	0	21	0	13	0	4	0	0	0	19.7333
miR-195-5p_0_1	miR-195-5p	TAGCAGCACAGAAATATTGGCA		3'temp		25	0	5	48	0	0	0	0	0	43	0	18	0	0	69	17	0	54	74	35	0	0	0	0	5	0	0	0	7	6	13.5333
miR-195-5p_0_1	miR-195-5p	TAGCAGCACATAAATATTGGCG		3'non-temp	11G>T	24	22	21	13	7	99	27	35	18	9	28	8	9	23	27	9	66	21	28	14	25	7	7	4	11	13	42	34	11	30	23.0667
miR-196b-5p_0_0	miR-196b-5p	TAGGTAGTTTCCTGTTGTTGGG		canon		41	1	1	0	0	0	9	42	0	0	4	0	0	0	0	0	26	218	0	0	0	0	0	0	0	0	0	22	0	13	12.5667
miR-196b-5p_0_1	miR-196b-5p	TAGGTAGTTTCCTGTTGTTGGGA		3'temp		21	0	5	0	0	0	0	0	11	0	35	0	12	0	0	5	0	0	0	0	228	0	75	0	0	0	0	0	1	0	13.1
miR-197-3p_0_-1	miR-197-3p	TTCACCACCTTCTCCACCCAG		3'trim		357	660	57	506	516	254	1037	1099	232	740	98	228	817	318	331	266	642	664	1134	923	564	1732	253	283	101	503	321	357	493	733	540.633
miR-197-3p_0_0	miR-197-3p	TTCACCACCTTCTCCACCCAGC		canon		816	1469	91	989	895	360	3508	2661	333	379	177	691	1687	476	836	852	769	1505	2087	1203	1313	3020	579	625	224	1004	356	728	794	1157	1052.8
miR-199a-3p_-1_-1	miR-199a-3p	CAGTAGTCTGCACATTGGTT	5'trim	3'trim		195	181	51	463	154	91	21	67	4	0	38	154	324	28	162	206	302	734	830	300	88	525	220	412	14	234	61	83	177	200	210.633
miR-199a-3p_0_-1	miR-199a-3p	ACAGTAGTCTGCACATTGGTT		3'trim		556	1692	75	370	645	193	404	631	128	669	156	69	687	321	206	920	623	1074	1419	1558	0	330	478	229	301	504	301	392	400	254	519.5
miR-199a-3p_0_-2	miR-199a-3p	ACAGTAGTCTGCACATTGGT		3'trim		361	1147	102	209	195	119	700	791	137	416	50	85	715	138	436	418	561	902	1549	912	95	1279	367	315	311	238	208	132	138	229	441.833
miR-199a-3p_0_0	miR-199a-3p	ACAGTAGTCTGCACATTGGTTA		canon		698	1628	63	554	176	21	225	558	76	1	148	125	666	83	45	194	172	331	562	82	4	161	179	184	113	732	111	196	72	170	277.667
miR-199a-5p_-1_0	miR-199a-5p	CCAGTGTTCAGACTACCTGTTC	5'trim			106	258	4	59	0	0	127	213	3	60	0	24	101	0	37	14	18	11	24	115	0	0	14	261	7	90	0	43	51	22	55.4
miR-199a-5p_0_-1	miR-199a-5p	CCCAGTGTTCAGACTACCTGTT		3'trim		44	173	8	55	241	0	51	28	21	0	0	80	107	29	51	11	54	56	0	30	40	249	36	0	0	119	36	5	64	14	53.4
miR-199a-5p_0_0	miR-199a-5p	CCCAGTGTTCAGACTACCTGTTC		canon		380	939	48	357	291	68	261	345	42	449	56	137	332	78	77	92	338	429	548	129	110	360	80	282	117	632	56	134	164	86	247.233
miR-200a-3p_0_-1	miR-200a-3p	TAACACTGTCTGGTAACGATG		3'trim		23	40	14	0	187	15	6	0	33	92	0	0	0	28	112	45	220	156	90	1	51	0	37	174	4	172	16	45	0	0	52.0333
miR-200a-3p_0_0	miR-200a-3p	TAACACTGTCTGGTAACGATGT		canon		22	49	0	99	111	0	0	0	4	0	7	0	35	40	76	63	51	103	112	0	11	75	27	0	24	109	0	38	61	29	38.2
miR-200b-3p_0_-1	miR-200b-3p	TAATACTGCCTGGTAATGATG		3'trim		58	21	1	0	0	21	0	0	11	0	0	0	25	37	0	13	202	1	0	2	0	0	0	0	0	4	0	0	0	9	13.5
miR-200b-3p_0_0	miR-200b-3p	TAATACTGCCTGGTAATGATGA		canon		42	0	0	0	0	0	6	28	0	0	26	31	66	11	20	0	37	9	0	29	0	0	0	0	0	34	4	29	0	25	13.2333
miR-200b-5p_0_-1	miR-200b-5p	CATCTTACTGGGCAGCATTGG		3'trim		20	54	8	0	0	0	84	0	0	0	0	0	0	0	0	11	100	0	0	92	3	0	0	73	0	38	27	29	0	0	17.9667
miR-200c-3p_0_-1	miR-200c-3p	TAATACTGCCGGGTAATGATGG		3'trim		0	172	3	56	0	107	15	73	6	78	11	22	78	24	95	47	65	597	202	57	203	0	15	0	10	17	47	25	45	45	70.5
miR-200c-3p_0_0	miR-200c-3p	TAATACTGCCGGGTAATGATGGA		canon		17	31	1	0	0	0	32	105	0	0	19	23	83	23	10	32	139	0	224	51	0	0	0	0	5	73	0	45	31	0	31.4667
miR-203a-3p_0_-6	miR-203a-3p	GTGAAATGTTTAGGAC		3'trim		337	1421	45	290	330	47	1482	1104	178	1841	390	600	60	250	411	340	569	185	263	180	37	1500	1121	1065	188	82	226	283	149	42	500.533
miR-204-5p_0_0	miR-204-5p	TTCCCTTTGTCATCCTATGCCT		canon		30	49	1	0	45	17	51	60	1	0	23	23	0	18	24	0	30	128	108	71	0	100	100	93	0	0	0	20	84	52	37.6
miR-204-5p_0_2	miR-204-5p	TTCCCTTTGTCATCCTATGCCTGT		3'non-temp		0	57	0	54	0	30	0	0	0	0	22	0	0	39	0	0	36	0	42	0	0	0	0	0	0	0	0	0	35	9	10.8
miR-205-5p_0_0	miR-205-5p	TCCTTCATTCCACCGGAGTCTG		canon		0	27	0	0	0	0	26	71	0	0	0	0	0	9	12	1	16	46	71	0	0	0	13	0	0	0	16	2	47	0	11.9
miR-206_0_0	miR-206	TGGAATGTAAGGAAGTGTGTGG		canon		61	365	25	158	0	0	1	1	4	0	0	0	3	23	119	43	99	320	671	279	119	0	0	0	38	0	0	1	0	8	77.9333
miR-20a-5p_0_0	miR-20a-5p	TAAAGTGCTTATAGTGCAGGTAG		canon		15	50	38	0	0	0	1	0	134	0	10	0	0	54	24	41	56	0	0	0	0	0	23	0	42	16	12	42	25	6	19.6333
miR-20a-5p_0_1	miR-20a-5p	TAAAGTGCTTATAGTGCAGGTAGT		3'temp		119	135	5	0	0	0	0	0	0	0	0	5	11	0	0	0	15	0	0	0	0	208	0	0	9	73	0	0	0	0	19.3333
miR-21-3p_0_0	miR-21-3p	CAACACCAGTCGATGGGCTGT		canon		36	152	10	126	13	0	92	71	55	0	18	77	26	14	0	35	51	61	0	145	77	231	49	0	13	55	17	69	53	0	51.5333
miR-21-5p_0_-1	miR-21-5p	TAGCTTATCAGACTGATGTTG		3'trim		10646	34020	4633	14767	7665	6557	20585	19705	4839	10065	4684	10797	15243	8932	7449	14104	24039	12240	29497	19212	9058	16962	10885	7789	6238	10985	7998	6578	9838	8662	12489.1
miR-21-5p_0_0	miR-21-5p	TAGCTTATCAGACTGATGTTGA		canon		24229	69898	8165	28247	13728	10355	42781	43762	9974	18322	8545	17501	40390	16622	13440	25526	35441	16949	42946	32513	15164	23458	18901	12769	7852	24904	14952	13718	19786	15962	22893.3
miR-2110_0_-1	miR-2110	TTGGGGAAACGGCCGCTGAGT		3'trim		36	179	74	0	30	235	517	248	105	392	104	65	48	236	112	57	268	219	342	252	308	40	193	143	244	56	116	120	169	59	165.567
miR-2110_0_0	miR-2110	TTGGGGAAACGGCCGCTGAGTG		canon		19	0	13	0	5	44	3	14	47	12	59	21	201	51	80	41	30	43	0	182	186	49	85	66	168	82	56	122	63	9	58.3667
miR-2110_0_1	miR-2110	TTGGGGAAACGGCCGCTGAGTGA		3'temp		54	149	27	26	52	59	86	106	29	0	42	95	92	275	123	26	23	87	132	211	338	49	10	181	77	67	66	88	88	46	90.1333
miR-214-3p_1_-3	miR-214-3p	TACAGCAGGCACAGACAGGC	5'temp	3'trim		0	22	0	0	0	8	0	0	0	421	0	0	79	38	19	0	0	0	0	82	0	0	0	0	0	26	53	0	12	0	25.3333
miR-214-3p_1_-4	miR-214-3p	TACAGCAGGCACAGACAGG	5'temp	3'trim		45	0	0	0	0	16	24	67	0	0	0	0	0	0	0	33	104	0	114	65	38	0	12	0	0	0	0	0	33	15	18.8667
miR-215-5p_0_-1	miR-215-5p	ATGACCTATGAATTGACAGA		3'trim		223	557	45	244	0	61	87	313	88	159	108	91	498	139	281	935	1227	210	269	389	281	262	64	122	69	282	201	36	110	26	245.9
miR-215-5p_0_0	miR-215-5p	ATGACCTATGAATTGACAGAC		canon		39	206	19	168	0	0	146	130	0	0	0	53	208	46	56	111	331	0	268	94	0	0	0	0	0	160	53	31	0	0	70.6333
miR-215-5p_0_1	miR-215-5p	ATGACCTATGAATTGACAGACA		3'temp		0	0	13	0	0	8	22	91	3	59	0	170	92	44	60	90	167	332	82	144	296	0	0	0	0	6	74	3	0	0	58.5333
miR-22-3p_0_-2	miR-22-3p	AAGCTGCCAGTTGAAGAACT		3'trim		1305	3359	1540	2587	2380	2058	2847	3518	2879	1605	2067	2552	2423	4083	1806	1639	3569	4817	5732	3916	4865	2903	2530	3919	3640	1557	2316	1223	2555	1282	2782.4
miR-22-3p_0_0	miR-22-3p	AAGCTGCCAGTTGAAGAACTGT		canon		6178	19861	4568	10527	10340	5231	14591	14445	6365	8207	6161	7698	14109	13391	4182	4801	7855	7997	16604	10682	9476	11245	6126	7893	6689	6040	6291	10061	15849	7430	9363.1
miR-221-3p_0_-1	miR-221-3p	AGCTACATTGTCTGCTGGGTTT		3'trim		711	2992	294	787	893	354	1702	2045	342	1671	145	668	2366	620	554	1216	1654	745	3066	1374	306	1833	1123	1920	376	1068	317	909	1353	1104	1150.27
miR-221-3p_0_-2	miR-221-3p	AGCTACATTGTCTGCTGGGTT		3'trim		766	3244	345	638	969	246	2258	2012	264	655	454	828	1822	594	1518	2066	2167	1638	4202	3406	1203	1824	1389	1911	858	608	698	1515	2190	1203	1449.7
miR-221-3p_0_-3	miR-221-3p	AGCTACATTGTCTGCTGGGT		3'trim		2536	8698	1084	1730	2634	803	3604	3961	1375	3582	806	2291	4709	2913	2736	4607	6395	7824	10650	7542	3511	3714	2539	5310	2375	2286	1816	4164	5171	3986	3845.07
miR-222-3p_0_0	miR-222-3p	AGCTACATCTGGCTACTGGGT		canon		1948	7803	887	1340	1564	558	4851	6065	1294	2452	1074	2324	4235	2266	2053	2940	4512	5483	5941	6761	2489	4747	1886	3789	1513	1967	1730	2652	3375	1748	3074.9
miR-222-3p_0_2	miR-222-3p	AGCTACATCTGGCTACTGGGTCT		3'temp		2889	5668	288	1716	1023	162	3247	4264	558	1405	561	1919	3138	1046	1103	1857	2181	3783	5236	3605	1896	2858	1290	2572	660	2264	612	1033	1216	1111	2038.7
miR-223-3p_0_0	miR-223-3p	TGTCAGTTTGTCAAATACCCCA		canon		4055	12093	534	8697	4524	1196	11060	9738	1328	2211	615	3062	8476	1820	2688	3632	5202	7629	9745	5519	2245	5244	2398	3676	1384	5334	1846	3066	4819	4614	4615
miR-223-3p_0_1	miR-223-3p	TGTCAGTTTGTCAAATACCCCAA		3'temp		2901	8287	408	9198	4030	1440	7878	7142	808	3096	868	2938	5807	1399	1882	3026	3501	7847	9614	6491	1522	3943	2152	2479	839	4450	1686	3229	5655	3926	3948.07
miR-223-5p_0_-1	miR-223-5p	CGTGTATTTGACAAGCTGAGT		3'trim		93	188	24	63	0	0	85	301	17	0	6	64	85	6	49	132	140	0	6	1	1	0	6	88	0	35	18	0	46	0	48.4667
miR-223-5p_0_0	miR-223-5p	CGTGTATTTGACAAGCTGAGTT		canon		68	57	6	92	0	14	224	248	18	69	30	62	95	22	77	61	110	198	0	165	235	118	60	0	0	0	51	30	23	0	71.1
miR-223-5p_0_1	miR-223-5p	CGTGTATTTGACAAGCTGAGTTG		3'temp		67	170	26	110	0	116	795	395	80	72	23	134	207	83	46	71	278	61	383	410	0	373	88	18	12	120	198	48	45	42	149.033
miR-223-5p_0_2	miR-223-5p	CGTGTATTTGACAAGCTGAGTTGG		3'temp		90	59	8	29	90	24	84	63	2	140	9	164	104	0	3	52	162	96	1	46	12	0	67	48	2	130	3	9	0	12	50.3
miR-224-5p_0_0	miR-224-5p	CAAGTCACTAGTGGTTCCGTT		canon		16	87	0	130	0	0	1	1	39	261	0	186	171	70	62	199	50	285	142	285	230	0	1	153	0	42	64	6	39	99	87.3
miR-224-5p_0_1	miR-224-5p	CAAGTCACTAGTGGTTCCGTTT		3'temp		406	423	51	289	70	58	516	676	60	378	125	437	94	82	413	370	247	282	1762	695	373	563	199	236	40	293	86	107	386	304	334.033
miR-23a-3p_0_0	miR-23a-3p	ATCACATTGCCAGGGATTTCC		canon		5505	16562	845	15515	8826	4957	11500	12787	1685	5806	1390	6037	10536	2293	3705	6045	8675	15679	16991	13180	4489	9593	4397	4425	1645	6294	2859	3646	6668	5302	7261.23
miR-23a-3p_0_1	miR-23a-3p	ATCACATTGCCAGGGATTTCCA		3'temp		13203	37091	1670	22204	11849	6184	23047	27294	3093	11270	3255	9770	21556	4460	5960	10132	12709	17818	26050	14548	8310	14909	7850	7393	2282	16056	4600	6844	9029	8144	12286
miR-23a-5p_0_-1	miR-23a-5p	GGGGTTCCTGGGGATGGGATT		3'trim		61	43	4	153	37	0	189	215	21	266	13	110	68	32	111	76	4	440	177	27	7	0	79	158	29	14	52	8	52	77	84.1
miR-23a-5p_0_-2	miR-23a-5p	GGGGTTCCTGGGGATGGGAT		3'trim		0	68	2	119	0	12	22	76	14	0	0	0	0	1	0	42	0	0	0	0	48	0	20	0	0	20	0	36	29	0	16.9667
miR-23a-5p_0_0	miR-23a-5p	GGGGTTCCTGGGGATGGGATTT		canon		28	121	15	0	0	0	71	143	32	338	18	0	32	20	15	5	0	17	0	0	0	0	209	62	3	7	34	74	0	69	43.7667
miR-23b-3p_0_0	miR-23b-3p	ATCACATTGCCAGGGATTACC		canon		419	1112	53	1242	1195	260	1141	829	132	862	292	763	1204	346	238	321	351	708	941	949	787	222	366	483	203	554	112	251	238	335	563.633
miR-23b-3p_0_1	miR-23b-3p	ATCACATTGCCAGGGATTACCA		3'temp		807	2088	104	599	433	140	1001	692	77	630	126	280	421	53	129	358	257	797	1021	507	274	1226	244	182	87	753	68	229	211	200	466.467
miR-23b-3p_0_3	miR-23b-3p	ATCACATTGCCAGGGATTACCACT		3'non-temp		1083	2315	40	768	569	357	1176	858	55	486	111	497	1078	63	240	366	352	569	1031	350	193	367	224	453	63	508	171	201	186	174	496.8
miR-23c_1_-1	miR-23c	CATCACATTGCCAGGGATTTCC	5'temp	3'trim	14T>G,19A>T	0	0	1	0	0	0	13	23	0	173	0	1	0	18	0	20	0	50	0	0	0	0	0	0	0	25	0	30	0	28	12.7333
miR-24-2-5p_1_-1	miR-24-2-5p	GTGCCTACTGAGCTGAAACACA	5'temp	3'trim		41	51	0	0	0	115	45	124	0	0	26	120	152	0	0	22	88	104	191	122	0	0	101	82	16	99	13	0	51	0	52.1
miR-24-2-5p_1_1	miR-24-2-5p	GTGCCTACTGAGCTGAAACACAGT	5'temp	3'temp		75	54	3	0	0	0	0	0	0	21	2	73	0	0	0	47	0	0	42	124	0	0	0	0	0	0	0	0	0	36	15.9
miR-24-3p_0_-1	miR-24-3p	TGGCTCAGTTCAGCAGGAACA		3'trim		4531	13378	1883	6687	5701	3268	12239	12006	3993	6811	2996	5662	7806	4451	3078	3252	5556	6772	11995	4719	6966	6920	3750	3565	2891	5126	3604	3064	3334	2994	5633.27
miR-24-3p_0_-2	miR-24-3p	TGGCTCAGTTCAGCAGGAAC		3'trim		3191	10968	863	7314	8119	2680	8597	8604	1701	6022	1482	4657	5125	2849	2490	4526	5567	5743	10644	7648	3109	5971	3736	4122	1829	3104	2721	2469	5054	3308	4807.1
miR-24-3p_0_0	miR-24-3p	TGGCTCAGTTCAGCAGGAACAG		canon		21353	54462	3302	27614	18600	8454	35031	37085	6608	22681	8478	23225	27578	9458	9165	12005	17634	26905	48076	29280	14846	18679	15037	10990	5544	22103	9599	8397	11389	12970	19218.3
miR-25-3p_0_0	miR-25-3p	CATTGCACTTGTCTCGGTCTGA		canon		9967	12120	7814	9646	7233	19253	16954	18335	16107	9106	10660	8341	16806	28791	12931	9776	16163	16794	18655	13658	27371	17695	6221	7575	11622	10225	17665	17207	8422	9268	13746
miR-25-5p_0_0	miR-25-5p	AGGCGGAGACTTGGGCAATTG		canon		11	0	0	0	0	88	0	0	3	166	0	0	0	64	0	0	0	0	242	0	19	0	0	0	0	0	0	0	0	15	20.2667
miR-25-5p_0_1	miR-25-5p	AGGCGGAGACTTGGGCAATTGC		3'temp		0	0	0	167	0	18	0	0	0	0	0	0	0	0	0	0	0	0	59	0	0	0	118	0	24	3	0	0	0	0	12.9667
miR-26a-5p_0_-2	miR-26a-5p	TTCAAGTAATCCAGGATAGG		3'trim		843	1549	493	1584	402	659	1079	773	454	806	407	819	820	556	528	931	1693	1616	1574	1330	850	1068	966	762	486	488	521	1043	698	697	883.167
miR-26a-5p_0_0	miR-26a-5p	TTCAAGTAATCCAGGATAGGCT		canon		2613	5744	278	12946	4999	2314	2180	1904	316	2241	675	1534	3058	641	933	1702	2544	2917	3302	2634	779	3503	903	667	233	2055	589	1306	1467	1248	2274.17
miR-26b-3p_0_0	miR-26b-3p	CCTGTTCTCCATTACTTGGCTC		canon		0	67	1	27	34	0	17	0	0	0	0	0	63	6	0	0	74	0	0	0	0	6	0	30	0	0	0	0	0	10	11.1667
miR-26b-5p_0_0	miR-26b-5p	TTCAAGTAATTCAGGATAGGT		canon		1278	1517	843	598	9	583	994	975	960	694	866	767	642	880	1000	811	1271	1056	1173	1400	777	1275	553	271	418	353	764	2525	579	661	883.1
miR-26b-5p_0_1	miR-26b-5p	TTCAAGTAATTCAGGATAGGTT		3'temp		7773	12997	1105	6754	1845	2047	5177	4574	1323	5203	2208	4754	6001	1826	4133	4556	7413	4911	10051	9790	4403	3558	2557	2528	805	4849	1515	7026	2409	2972	4568.77
miR-27a-3p_0_-1	miR-27a-3p	TTCACAGTGGCTAAGTTCCG		3'trim		4009	13188	702	13241	8673	4299	10863	9197	1111	6819	1569	4904	6336	1653	3058	5738	6478	8671	15213	11479	3786	4778	3271	3199	1083	5523	2390	2761	5566	4713	5809.03
miR-27a-5p_0_0	miR-27a-5p	AGGGCTTAGCTGCTTGTGAGCA		canon		18	18	0	0	0	34	16	42	0	0	0	105	0	13	9	0	48	0	0	100	0	0	30	0	43	52	48	51	0	0	20.9
miR-27b-3p_0_-2	miR-27b-3p	TTCACAGTGGCTAAGTTCT		3'trim		1365	2798	261	2716	1121	593	1799	1432	361	1051	600	2085	2288	445	530	1062	1540	2150	3165	2008	1439	1512	890	815	410	842	784	635	842	1105	1288.13
miR-27b-3p_0_-3	miR-27b-3p	TTCACAGTGGCTAAGTTC		3'trim		444	767	102	328	356	167	679	827	85	65	122	356	446	182	397	413	494	558	729	525	154	442	178	0	72	301	182	656	480	246	358.433
miR-27b-3p_0_-5	miR-27b-3p	TTCACAGTGGCTAAGT		3'trim		569	488	68	544	389	62	267	821	103	623	109	384	195	148	121	391	1079	395	1426	748	160	141	391	370	176	226	340	290	291	227	384.733
miR-27b-3p_0_0	miR-27b-3p	TTCACAGTGGCTAAGTTCTGC		canon		495	1569	50	1565	973	383	850	897	60	741	91	730	965	180	232	499	602	391	1617	697	456	538	502	381	39	660	38	201	300	324	567.533
miR-28-3p_0_-1	miR-28-3p	CACTAGATTGTGAGCTCCTGG		3'trim		166	323	13	180	517	0	51	142	72	723	0	85	154	74	120	198	80	233	76	325	244	111	97	238	21	104	80	86	75	127	157.167
miR-28-3p_0_0	miR-28-3p	CACTAGATTGTGAGCTCCTGGA		canon		530	1106	30	405	643	81	534	983	60	532	101	374	367	273	459	168	597	553	407	410	667	459	378	949	233	682	232	218	320	166	430.567
miR-28-5p_0_-1	miR-28-5p	AAGGAGCTCACAGTCTATTGA		3'trim		18	129	0	82	0	0	179	117	15	71	83	185	237	15	48	82	259	0	48	133	0	514	31	0	47	76	17	25	90	0	83.3667
miR-28-5p_0_0	miR-28-5p	AAGGAGCTCACAGTCTATTGAG		canon		318	641	49	50	126	98	214	379	37	196	120	277	311	72	41	121	230	465	85	159	0	360	293	188	153	252	52	72	40	50	181.633
miR-29a-3p_0_-1	miR-29a-3p	TAGCACCATCTGAAATCGGTT		3'trim		1155	4579	322	2192	1659	431	2955	2567	446	2598	675	1967	2183	1380	910	2550	2371	3332	4827	3530	1595	3738	2527	1761	583	1894	1076	942	1857	1307	1996.97
miR-29a-3p_0_-2	miR-29a-3p	TAGCACCATCTGAAATCGGT		3'trim		1616	5392	555	2353	2091	712	4082	3566	945	2919	905	3019	2890	1614	1327	2787	5311	4226	10721	6078	2879	5733	4743	2307	1003	2338	1457	712	1644	1417	2911.4
miR-29a-3p_0_-3	miR-29a-3p	TAGCACCATCTGAAATCGG		3'trim		547	2478	164	1709	566	467	1381	1491	236	1059	333	1329	1305	608	637	1363	2881	3937	4904	2871	1360	1614	1503	1246	542	1061	597	288	459	699	1321.17
miR-29b-3p_0_-2	miR-29b-3p	TAGCACCATTTGAAATCAGTG		3'trim		87	122	52	41	0	36	77	75	55	230	50	119	194	37	114	37	295	74	181	130	166	222	159	91	73	128	19	237	27	57	106.167
miR-29b-3p_0_-3	miR-29b-3p	TAGCACCATTTGAAATCAGT		3'trim		56	252	42	62	0	24	93	48	43	0	72	101	14	61	23	66	233	287	39	201	90	585	150	75	47	66	73	48	184	68	103.433
miR-29b-3p_0_-4	miR-29b-3p	TAGCACCATTTGAAATCAG		3'trim		73	34	7	1	65	85	11	33	6	0	6	16	93	3	9	41	129	114	413	62	0	124	0	118	48	0	1	9	11	0	50.4
miR-29c-3p_0_-2	miR-29c-3p	TAGCACCATTTGAAATCGGT		3'trim		132	231	94	115	122	76	42	144	59	527	68	30	170	90	83	196	159	367	306	232	72	151	195	93	143	107	92	81	299	70	151.533
miR-29c-3p_0_-3	miR-29c-3p	TAGCACCATTTGAAATCGG		3'trim		88	282	36	571	73	68	81	265	65	231	136	73	232	136	45	134	533	192	760	586	108	267	199	84	67	115	203	36	134	58	195.267
miR-29c-3p_0_-6	miR-29c-3p	TAGCACCATTTGAAAT		3'trim		114	233	17	0	84	151	306	327	32	264	50	39	41	17	58	125	200	186	250	137	146	101	130	135	55	131	76	36	153	17	120.367
miR-30a-3p_0_-1	miR-30a-3p	CTTTCAGTCGGATGTTTGCAG		3'trim		32	93	4	128	44	100	173	179	9	14	0	57	129	17	18	145	80	264	263	195	71	0	27	107	25	66	39	11	114	17	80.7
miR-30a-3p_0_0	miR-30a-3p	CTTTCAGTCGGATGTTTGCAGT			22C>T	48	84	0	49	65	34	15	54	0	0	68	3	0	9	0	69	136	240	191	132	30	0	64	47	13	16	7	15	0	0	46.3
miR-30a-3p_0_0	miR-30a-3p	CTTTCAGTCGGATGTTTGCAGC		canon		54	207	4	111	0	45	76	190	6	1	29	183	93	25	37	41	109	338	107	119	0	0	67	42	43	159	17	21	85	72	76.0333
miR-30a-5p_0_-1	miR-30a-5p	TGTAAACATCCTCGACTGGAA		3'trim		558	1409	123	822	464	194	1612	1231	122	483	268	457	1542	344	560	946	1496	734	2052	1288	515	914	891	361	152	513	370	332	437	348	717.933
miR-30a-5p_0_0	miR-30a-5p	TGTAAACATCCTCGACTGGAAG		canon		394	1822	137	1176	1003	198	1695	1909	238	417	215	813	1964	364	900	1145	2557	1446	1902	2003	675	1822	972	476	387	547	669	559	765	641	993.7
miR-30a-5p_0_1	miR-30a-5p	TGTAAACATCCTCGACTGGAAGC		3'temp		322	1454	89	742	465	230	1105	1495	104	1173	176	889	1295	275	480	943	1563	916	1713	1192	499	1978	599	919	221	583	402	239	619	296	765.867
miR-30a-5p_0_2	miR-30a-5p	TGTAAACATCCTCGACTGGAAGCT		3'temp		810	2860	162	2324	2228	532	3492	2337	344	1675	446	1451	2458	810	852	1280	3082	1874	3260	2551	1328	4654	1189	1648	378	1189	540	415	752	476	1579.9
miR-30b-5p_0_0	miR-30b-5p	TGTAAACATCCTACACTCAGCT		canon		83	52	4	0	0	0	101	52	24	18	9	34	26	16	39	30	58	55	1	0	15	0	0	26	7	27	3	12	62	35	26.3
miR-30c-5p_0_-1	miR-30c-5p	TGTAAACATCCTACACTCTCAG		3'trim		152	340	75	310	66	110	176	482	139	236	20	176	168	217	136	334	177	225	555	334	346	112	77	236	129	150	153	206	41	98	199.2
miR-30c-5p_0_-2	miR-30c-5p	TGTAAACATCCTACACTCTCA		3'trim		95	180	123	165	0	83	432	202	201	75	21	31	242	296	48	69	209	250	133	132	8	414	0	97	85	78	128	267	54	34	138.4
miR-30c-5p_0_1	miR-30c-5p	TGTAAACATCCTACACTCTCAGCT		3'temp		1049	2464	73	845	202	142	747	933	98	592	200	699	1016	182	297	493	661	673	1542	629	408	507	435	575	120	1076	133	114	70	532	583.567
miR-30d-5p_0_-1	miR-30d-5p	TGTAAACATCCCCGACTGGAA		3'trim		2096	5015	1468	3888	2144	3516	5494	4005	2172	3349	1691	1955	3783	3725	2423	2403	4002	4708	5671	4783	2727	7527	2247	1438	1822	2225	2728	2551	3033	2835	3247.47
miR-30d-5p_0_-2	miR-30d-5p	TGTAAACATCCCCGACTGGA		3'trim		2271	4738	1501	5179	1835	2799	3266	3145	2052	1967	1731	2541	4190	3389	2557	2860	4671	4652	5565	3809	2500	5361	2977	3064	2494	2516	3146	2143	2142	1549	3087
miR-30d-5p_0_0	miR-30d-5p	TGTAAACATCCCCGACTGGAAG		canon		2549	8043	1652	6041	4419	3303	7362	5738	2509	3563	2154	3816	7313	4245	4402	4506	6180	6412	6299	7074	5762	8152	3079	1648	1941	3485	2749	2997	3554	2771	4457.27
miR-30d-5p_0_2	miR-30d-5p	TGTAAACATCCCCGACTGGAAGCT		3'temp		8733	19755	2328	12813	6077	5348	13218	12532	3619	7281	4417	6609	13924	8379	5547	6889	12897	10441	15705	9862	8275	19627	4753	6102	3211	10329	5008	5448	4443	3765	8577.83
miR-30e-3p_0_0	miR-30e-3p	CTTTCAGTCGGATGTTTACAGT			22C>T	403	610	43	267	1	146	291	450	113	278	224	309	672	183	189	297	540	585	1045	764	275	388	530	258	104	480	178	98	291	167	339.3
miR-30e-3p_0_0	miR-30e-3p	CTTTCAGTCGGATGTTTACAGC		canon		236	404	10	193	266	174	321	695	38	452	47	203	425	40	156	246	268	422	346	159	50	300	222	308	9	208	103	71	52	16	214.667
miR-30e-5p_-1_2	miR-30e-5p	GTAAACATCCTTGACTGGAAGCT	5'trim	3'temp		872	1944	484	963	705	816	2162	1725	657	879	612	783	1457	1342	830	802	1376	830	2281	2230	1089	2761	1115	1099	718	767	836	1358	913	655	1168.7
miR-30e-5p_0_2	miR-30e-5p	TGTAAACATCCTTGACTGGAAGCT		3'temp		3925	9873	2728	5997	2861	3362	9634	8817	3630	4475	2993	3337	9848	7392	2364	3580	6808	4759	8313	6673	4901	9362	3766	3517	2530	4544	3815	5434	4960	2941	5237.97
miR-31-5p_0_0	miR-31-5p	AGGCAAGATGCTGGCATAGCT		canon		0	40	0	0	341	0	0	0	0	0	0	0	86	0	0	0	0	0	0	0	0	0	0	0	0	0	0	14	47	0	17.6
miR-31-5p_0_2	miR-31-5p	AGGCAAGATGCTGGCATAGCTGT		3'temp		0	0	0	0	0	48	0	0	0	0	0	76	0	0	0	0	0	65	0	141	9	0	0	0	0	0	0	47	17	0	13.4333
miR-3158-3p_0_-1	miR-3158-3p	AAGGGCTTCCTCTCTGCAGGA		3'trim		78	10	88	30	85	197	65	0	69	158	148	69	183	155	51	0	63	78	0	0	264	673	118	39	151	39	95	49	17	107	102.633
miR-3158-3p_0_0	miR-3158-3p	AAGGGCTTCCTCTCTGCAGGAC		canon		31	0	12	0	0	95	0	0	34	193	54	0	0	91	0	48	0	0	0	0	64	0	43	47	12	0	72	23	31	0	28.3333
miR-3173-5p_0_-1	miR-3173-5p	TGCCCTGCCTGTTTTCTCCTT		3'trim		0	39	9	0	0	24	0	1	25	0	14	0	22	166	14	0	1	72	199	3	0	0	51	4	26	15	30	96	0	0	27.0333
miR-3173-5p_0_0	miR-3173-5p	TGCCCTGCCTGTTTTCTCCTTT		canon		78	98	5	207	0	41	170	59	69	0	4	7	163	101	108	91	30	153	102	0	89	369	19	0	8	93	34	50	89	24	75.3667
miR-3177-3p_0_0	miR-3177-3p	TGCACGGCACTGGGGACACGT		canon		0	106	0	0	0	19	0	0	8	0	0	0	0	0	3	1	0	117	71	0	0	0	0	0	0	57	0	0	22	0	13.4667
miR-32-5p_0_-2	miR-32-5p	TATTGCACATTACTAAGTTG		3'trim		37	57	40	0	0	0	0	0	39	0	0	0	1	0	0	0	122	83	0	0	153	0	36	0	37	21	92	144	36	25	30.7667
miR-3200-5p_0_0	miR-3200-5p	AATCTGAGAAGGCGCACAAGGT		canon		0	78	17	0	0	0	25	67	10	0	26	0	0	32	0	0	0	0	0	7	0	0	0	84	4	0	38	0	0	27	13.8333
miR-320a_0_-1	miR-320a	AAAAGCTGGGTTGAGAGGGCG		3'trim		550	1331	491	1772	1056	1104	712	1239	524	999	1103	1000	1498	1383	1342	880	1281	2589	2278	1975	1648	943	1104	1346	1223	606	841	1199	1317	416	1191.67
miR-320a_0_0	miR-320a	AAAAGCTGGGTTGAGAGGGCGT			22A>T	523	844	269	813	422	523	423	968	283	1429	318	456	590	761	370	501	1134	1071	1186	1015	1044	281	639	753	604	346	439	639	708	389	658.033
miR-320a_0_0	miR-320a	AAAAGCTGGGTTGAGAGGGCGA		canon		1306	2632	726	2405	2597	1868	1130	2218	736	1497	1390	1273	2046	1954	1388	1545	2415	1683	2865	1456	1126	948	1622	2198	1262	1069	1013	1798	1366	651	1606.1
miR-320b_0_-3	miR-320b	AAAAGCTGGGTTGAGAGGG		3'trim		303	565	77	618	500	286	332	699	75	920	204	397	709	193	548	515	658	1588	1585	1078	649	332	467	398	335	207	203	256	577	230	516.8
miR-320c_-2_-1	miR-320c	AAGCTGGGTTGAGAGGG	5'trim	3'trim		6	133	1	0	0	0	0	0	6	1	0	27	0	30	0	0	0	122	0	0	0	0	0	0	0	0	14	0	0	69	13.6333
miR-320c_0_0	miR-320c	AAAAGCTGGGTTGAGAGGGT		canon		1	17	1	0	0	18	0	0	4	1	0	67	0	0	6	19	0	0	168	0	0	0	16	103	37	20	0	0	1	46	17.5
miR-320c_1_-2	miR-320c	GAAAAGCTGGGTTGAGAGG	5'temp	3'trim		35	0	6	0	73	19	0	0	3	0	25	0	0	31	0	32	114	0	98	0	38	0	36	0	35	2	0	3	30	0	19.3333
miR-320d_0_-2	miR-320d	AAAAGCTGGGTTGAGAG		3'trim		20	30	3	100	99	0	86	97	1	211	8	11	0	34	5	22	15	157	70	81	0	0	41	0	21	42	18	59	61	0	43.0667
miR-323a-3p_0_0	miR-323a-3p	CACATTACACGGTCGACCTCT		canon		150	245	0	49	121	0	55	209	10	0	0	0	106	39	30	9	0	117	53	171	0	0	0	0	0	140	0	0	33	0	51.2333
miR-323a-3p_1_0	miR-323a-3p	GCACATTACACGGTCGACCTCT	5'temp			61	65	6	0	0	0	15	51	17	115	0	0	0	0	27	0	0	0	258	57	0	0	0	0	0	133	0	0	0	0	26.8333
miR-323b-3p_0_-1	miR-323b-3p	CCCAATACACGGTCGACCTCT		3'trim		127	116	0	64	0	0	173	246	9	152	33	36	68	13	0	68	44	0	237	0	0	0	0	0	10	80	47	0	0	30	51.7667
miR-324-3p_0_1	miR-324-3p	ACTGCCCCAGGTGCTGCTGGT		3'non-temp		165	192	96	156	0	143	276	4	90	151	57	52	176	166	83	6	9	0	172	111	221	209	0	0	92	41	40	206	239	86	107.967
miR-324-3p_0_2	miR-324-3p	ACTGCCCCAGGTGCTGCTGGAA		3'non-temp		38	11	71	138	0	57	19	76	47	53	32	99	197	125	0	70	56	242	66	0	43	0	6	0	76	25	55	55	18	0	55.8333
miR-324-5p_0_-2	miR-324-5p	CGCATCCCCTAGGGCATTGGT		3'trim		18	3	11	0	0	103	0	0	24	0	15	0	41	28	35	0	0	0	0	0	0	0	58	59	0	0	0	65	0	10	15.6667
miR-326_0_1	miR-326	CCTCTGGGCCCTTCCTCCAGT		3'non-temp		66	134	7	0	0	0	18	105	7	104	13	0	27	0	6	12	118	0	39	70	0	0	24	0	0	63	35	45	113	80	36.2
miR-328-3p_0_-1	miR-328-3p	CTGGCCCTCTCTGCCCTTCCG		3'trim		17	0	14	86	39	30	39	143	19	33	0	8	1	72	76	10	55	78	47	6	0	0	43	120	19	0	17	30	9	0	33.7
miR-328-3p_0_0	miR-328-3p	CTGGCCCTCTCTGCCCTTCCGT		canon		203	252	27	127	34	69	602	67	33	116	19	88	196	54	136	59	110	0	0	26	0	485	39	143	49	112	10	8	0	105	105.633
miR-328-3p_0_1	miR-328-3p	CTGGCCCTCTCTGCCCTTCCGTT		3'non-temp		28	0	8	2	0	3	73	0	6	0	21	0	149	16	16	0	174	197	0	0	0	0	66	103	14	14	38	47	44	20	34.6333
miR-329-3p_-1_0	miR-329-3p	ACACACCTGGTTAACCTCTTT	5'trim			78	379	7	0	0	44	13	43	0	0	0	0	42	0	0	0	0	0	63	24	29	0	24	0	0	51	0	7	13	0	27.2333
miR-329-3p_-1_1	miR-329-3p	ACACACCTGGTTAACCTCTTTT	5'trim	3'temp		26	84	11	0	110	0	14	57	9	0	15	0	15	0	0	3	0	0	0	0	0	0	0	0	0	2	13	0	0	0	11.9667
miR-329-3p_0_-1	miR-329-3p	AACACACCTGGTTAACCTCTT		3'trim		65	325	3	42	0	0	115	155	3	0	29	23	83	11	49	1	63	151	237	247	0	0	0	0	0	54	0	8	11	0	55.8333
miR-329-3p_0_0	miR-329-3p	AACACACCTGGTTAACCTCTTT		canon		89	414	0	74	0	0	181	98	4	258	7	200	31	48	40	9	12	0	516	0	109	11	0	62	0	55	0	0	0	0	73.9333
miR-330-3p_0_0	miR-330-3p	GCAAAGCACACGGCCTGCAGAGA		canon		14	13	0	39	0	0	0	0	7	0	19	0	15	0	62	9	0	0	0	0	141	0	0	0	0	0	0	5	42	0	12.2
miR-331-3p_0_-1	miR-331-3p	GCCCCTGGGCCTATCCTAGA		3'trim		43	0	12	48	185	84	0	0	13	0	21	0	82	28	0	45	0	143	0	0	23	0	51	58	25	0	0	0	62	47	32.3333
miR-331-3p_0_1	miR-331-3p	GCCCCTGGGCCTATCCTAGAAT		3'non-temp		22	21	0	0	0	0	25	68	5	0	8	0	54	9	0	0	28	0	60	63	182	0	0	0	0	67	0	0	0	0	20.4
miR-331-5p_0_-2	miR-331-5p	CTAGGTATGGTCCCAGGGAT		3'trim		32	0	18	0	105	26	0	0	19	0	10	0	97	17	0	0	45	0	1	0	0	0	0	0	0	0	23	20	67	0	16
miR-335-3p_0_0	miR-335-3p	TTTTTCATTATTGCTCCTGACC		canon		48	33	2	113	0	0	70	0	3	0	7	27	0	0	0	0	26	0	0	0	0	0	0	0	0	0	0	5	0	0	11.1333
miR-335-5p_0_-1	miR-335-5p	TCAAGAGCAATAACGAAAAATG		3'trim		194	858	80	554	0	109	217	263	67	74	68	133	284	69	72	113	371	385	444	198	178	0	261	72	28	258	201	118	125	57	195.033
miR-335-5p_0_-2	miR-335-5p	TCAAGAGCAATAACGAAAAAT		3'trim		157	393	21	274	114	37	37	94	47	0	21	9	59	45	60	124	145	0	0	71	0	0	0	74	41	92	18	0	0	3	64.5333
miR-335-5p_0_0	miR-335-5p	TCAAGAGCAATAACGAAAAATGT		canon		122	534	22	125	0	17	113	163	14	61	13	175	120	47	57	116	91	0	329	0	0	0	6	0	0	62	55	18	94	62	80.5333
miR-337-3p_-1_0	miR-337-3p	TCCTATATGATGCCTTTCTTC	5'trim			36	235	9	0	0	0	9	49	3	0	0	0	0	0	10	0	0	0	0	36	35	0	0	0	0	24	0	7	0	0	15.1
miR-338-3p_0_-1	miR-338-3p	TCCAGCATCAGTGATTTTGTT		3'trim		0	0	1	0	0	14	0	0	0	0	0	0	0	14	0	0	11	0	302	0	0	0	0	0	0	0	0	0	0	0	11.4
miR-338-5p_0_-1	miR-338-5p	AACAATATCCTGGTGCTGAGT		3'trim		461	1129	73	253	21	72	888	966	166	965	59	496	1203	131	492	453	1038	726	1433	1062	189	384	596	584	185	575	214	194	259	325	519.733
miR-339-3p_0_-2	miR-339-3p	TGAGCGCCTCGACGACAGAGC		3'trim		79	70	44	149	0	182	250	56	77	82	33	197	157	153	55	81	232	525	0	188	168	71	60	295	134	105	67	12	24	20	118.867
miR-339-3p_0_-3	miR-339-3p	TGAGCGCCTCGACGACAGAG		3'trim		94	98	63	65	0	60	230	93	97	66	107	50	40	321	7	0	33	34	0	54	193	300	78	143	78	0	77	80	97	145	90.1
miR-339-3p_0_0	miR-339-3p	TGAGCGCCTCGACGACAGAGCCG		canon		57	638	22	180	71	150	85	164	30	18	41	72	226	16	60	120	68	44	72	0	437	186	16	0	34	223	65	143	118	92	114.933
miR-339-5p_0_0	miR-339-5p	TCCCTGTCCTCCAGGAGCTCACG		canon		94	143	0	56	105	30	177	65	0	0	7	35	201	7	0	27	7	0	73	43	0	209	8	49	24	94	6	10	0	21	49.7
miR-340-3p_0_-1	miR-340-3p	TCCGTCTCAGTTACTTTATAG		3'trim		33	14	12	86	0	72	8	51	24	0	38	0	0	39	0	58	51	0	88	0	0	168	0	0	11	38	84	15	0	68	31.9333
miR-340-3p_0_0	miR-340-3p	TCCGTCTCAGTTACTTTATAGC		canon		86	213	0	0	0	54	97	106	0	1	0	0	116	0	16	3	62	0	147	33	0	0	0	35	1	43	20	0	0	21	35.1333
miR-340-3p_0_1	miR-340-3p	TCCGTCTCAGTTACTTTATAGCC		3'temp		220	283	0	29	0	0	142	54	23	258	0	4	108	47	123	31	109	0	6	168	27	59	15	155	0	259	0	10	12	23	72.1667
miR-340-5p_0_-1	miR-340-5p	TTATAAAGCAATGAGACTGAT		3'trim		36	91	0	107	0	16	4	2	5	63	10	0	0	0	13	25	34	0	237	54	25	0	0	0	22	38	4	61	0	1	28.2667
miR-340-5p_0_0	miR-340-5p	TTATAAAGCAATGAGACTGATT		canon		330	791	21	132	140	13	500	509	38	532	123	253	349	82	111	157	518	50	313	255	65	465	94	322	30	396	100	84	195	48	233.867
miR-342-3p_0_-1	miR-342-3p	TCTCACACAGAAATCGCACCCG		3'trim		514	1278	97	1175	895	424	1294	1939	238	1524	435	1119	970	876	548	954	895	1922	1870	1103	603	1862	1093	1793	411	807	440	504	298	385	942.2
miR-342-3p_0_0	miR-342-3p	TCTCACACAGAAATCGCACCCGT		canon		356	2351	60	1242	1203	392	1241	1070	123	1011	243	650	858	668	827	847	691	2313	1968	1569	866	2358	1114	1408	285	836	451	675	629	821	970.867
miR-342-5p_-1_2	miR-342-5p	GGGGTGCTATCTGTGATTGAGG	5'trim	3'temp		0	0	1	94	0	0	23	77	3	0	13	48	107	19	0	0	56	187	203	16	0	0	40	0	0	62	20	8	54	0	34.3667
miR-342-5p_0_2	miR-342-5p	AGGGGTGCTATCTGTGATTGAGG		3'temp		25	79	3	0	0	0	0	0	0	143	0	0	74	16	0	8	96	205	91	0	44	0	34	0	0	23	0	31	52	14	31.2667
miR-345-5p_0_-1	miR-345-5p	GCTGACTCCTAGTCCAGGGCT		3'trim		53	192	46	80	0	179	305	101	56	0	64	93	168	288	137	55	83	161	126	54	52	286	48	0	43	90	55	29	42	88	99.1333
miR-345-5p_0_0	miR-345-5p	GCTGACTCCTAGTCCAGGGCTC		canon		60	232	26	11	499	0	52	136	69	0	61	106	246	55	0	174	72	405	259	0	0	0	30	0	51	36	3	123	176	54	97.8667
miR-345-5p_0_1	miR-345-5p	GCTGACTCCTAGTCCAGGGCTCT		3'non-temp		0	138	10	258	96	0	164	47	0	9	8	0	0	28	161	0	65	53	0	36	0	0	18	441	65	3	13	89	49	76	60.9
miR-34a-5p_0_0	miR-34a-5p	TGGCAGTGTCTTAGCTGGTTGT		canon		35	0	0	0	0	0	206	148	14	0	0	81	25	12	0	22	0	0	0	26	0	0	0	0	0	0	0	5	0	0	19.1333
miR-3605-3p_0_-2	miR-3605-3p	CCTCCGTGTTACCTGTCCTCT		3'trim		75	301	24	90	55	25	298	335	50	111	22	0	31	71	38	0	88	0	37	114	174	138	36	0	75	11	101	9	27	76	80.4
miR-3605-3p_0_-3	miR-3605-3p	CCTCCGTGTTACCTGTCCTC		3'trim		0	0	0	0	0	22	0	1	7	0	0	0	0	40	20	26	42	0	47	68	47	0	0	0	28	0	12	8	0	0	12.2667
miR-361-3p_0_-1	miR-361-3p	TCCCCCAGGTGTGATTCTGATT		3'trim		228	785	61	212	447	208	464	419	117	370	135	352	810	376	485	304	339	790	1294	739	49	1023	516	558	179	367	248	258	337	70	418
miR-361-3p_0_0	miR-361-3p	TCCCCCAGGTGTGATTCTGATTT		canon		175	187	14	208	360	78	122	212	16	384	26	57	81	112	171	186	195	403	412	183	102	653	114	182	53	162	123	56	218	46	176.367
miR-361-3p_0_1	miR-361-3p	TCCCCCAGGTGTGATTCTGATTTG		3'temp		91	163	4	201	150	72	276	323	37	298	75	77	176	97	30	97	263	560	263	164	100	65	117	127	59	148	98	108	89	50	145.933
miR-361-5p_0_-1	miR-361-5p	TTATCAGAATCTCCAGGGGTA		3'trim		192	70	0	4	0	46	304	75	62	223	3	52	34	16	51	96	82	114	148	0	149	1	28	0	20	77	31	55	42	13	66.2667
miR-361-5p_0_-2	miR-361-5p	TTATCAGAATCTCCAGGGGT		3'trim		153	476	35	226	0	40	252	383	40	0	19	100	136	84	155	298	252	220	462	369	70	0	64	151	21	93	104	111	13	116	148.1
miR-361-5p_0_-3	miR-361-5p	TTATCAGAATCTCCAGGGG		3'trim		58	193	18	162	0	0	43	1	5	0	51	95	78	38	38	39	125	39	253	244	0	0	0	51	37	81	26	134	106	20	64.5
miR-361-5p_0_0	miR-361-5p	TTATCAGAATCTCCAGGGGTAC		canon		75	128	37	152	126	13	59	148	36	0	0	99	154	63	0	106	85	22	44	247	150	181	46	0	2	93	46	39	16	82	74.9667
miR-3613-5p_0_-1	miR-3613-5p	TGTTGTACTTTTTTTTTTGTT		3'trim		298	532	135	478	198	290	564	420	181	403	168	260	359	466	331	480	816	311	796	334	732	1287	377	35	249	147	250	218	102	142	378.633
miR-3613-5p_0_-2	miR-3613-5p	TGTTGTACTTTTTTTTTGTT		3'trim	18T>G,19G>T	114	186	50	161	154	110	214	163	56	143	110	94	103	173	120	232	311	87	310	118	285	407	99	17	75	142	92	54	39	41	142
miR-3613-5p_0_-2	miR-3613-5p	TGTTGTACTTTTTTTTTTGT		3'trim		149	135	267	149	87	438	592	246	303	64	355	157	139	479	125	134	49	105	651	318	645	201	96	63	219	92	477	273	351	138	249.9
miR-3615_0_-1	miR-3615	TCTCTCGGCTCCTCGCGGCT		3'trim		46	149	82	57	128	101	379	84	161	57	72	83	126	414	64	151	87	565	62	129	226	0	115	56	134	1	152	80	107	141	133.633
miR-3615_0_1	miR-3615	TCTCTCGGCTCCTCGCGGCTCG		3'temp		157	384	97	274	211	329	689	463	323	186	102	136	420	380	246	204	353	910	772	349	381	535	87	268	164	237	170	174	324	191	317.2
miR-363-3p_0_-1	miR-363-3p	AATTGCACGGTATCCATCTGT		3'trim		471	633	1100	734	568	971	860	1064	1286	272	879	457	547	2308	188	69	417	758	917	515	1264	866	432	1045	1156	317	990	984	358	480	763.533
miR-363-3p_0_-2	miR-363-3p	AATTGCACGGTATCCATCTG		3'trim		533	472	591	694	180	634	515	426	715	506	363	261	59	888	124	134	163	428	589	229	439	224	267	77	563	383	784	460	449	242	413.067
miR-363-3p_0_0	miR-363-3p	AATTGCACGGTATCCATCTGTA		canon		118	545	80	333	0	64	450	181	125	0	187	120	317	335	72	60	146	567	564	223	437	391	129	165	159	99	133	169	119	167	215.167
miR-365a-3p_0_-2	miR-365a-3p	TAATGCCCCTAAAAATCCTT		3'trim		0	22	0	0	0	0	48	33	4	0	0	0	36	2	24	0	0	0	0	0	0	66	111	0	0	0	0	0	0	5	11.7
miR-365a-3p_0_-3	miR-365a-3p	TAATGCCCCTAAAAATCCT		3'trim		0	20	0	0	0	0	88	40	10	0	0	0	64	0	0	52	0	0	0	0	0	1	27	0	0	0	0	3	0	0	10.1667
miR-369-3p_0_0	miR-369-3p	AATAATACATGGTTGATCTTT		canon		237	548	9	13	0	0	114	155	6	0	52	0	24	25	26	85	61	0	281	36	64	193	0	0	0	6	50	0	0	5	66.3333
miR-369-5p_0_-1	miR-369-5p	AGATCGACCGTGTTATATTCG		3'trim		111	229	14	0	0	0	164	33	0	0	15	0	66	0	0	72	0	0	254	0	0	0	0	0	0	24	0	0	0	30	33.7333
miR-370-3p_0_0	miR-370-3p	GCCTGCTGGGGTGGAACCTGGT		canon		185	758	5	182	0	14	298	355	1	139	53	68	104	56	10	0	46	0	161	188	0	0	0	3	38	168	15	28	41	12	97.6
miR-371b-5p_0_0	miR-371b-5p	ACTCAAAAGATGGCGGCACTTT		canon		0	0	1	65	128	15	51	0	0	0	31	0	11	21	9	0	25	0	55	0	0	0	32	62	3	0	11	12	115	0	21.5667
miR-374a-3p_0_0	miR-374a-3p	CTTATCAGATTGTATTGTAATT		canon		52	160	0	58	0	0	0	0	7	0	0	0	0	4	71	96	31	0	0	3	0	0	0	0	0	20	0	33	18	0	18.4333
miR-374a-5p_0_-1	miR-374a-5p	TTATAATACAACCTGATAAGT		3'trim		380	435	198	142	4	87	338	356	167	76	152	16	216	183	83	159	226	421	3	236	232	0	211	4	192	21	119	172	13	103	164.833
miR-374a-5p_0_0	miR-374a-5p	TTATAATACAACCTGATAAGTG		canon		454	1220	115	288	117	136	273	360	203	319	243	39	403	154	252	285	324	120	240	131	476	626	205	153	89	261	108	187	78	119	265.933
miR-374b-5p_0_-1	miR-374b-5p	ATATAATACAACCTGCTAAGT		3'trim		351	208	125	98	0	30	363	145	213	85	93	101	141	236	99	98	134	50	403	128	216	225	15	97	27	11	109	153	54	293	143.367
miR-374b-5p_0_0	miR-374b-5p	ATATAATACAACCTGCTAAGTG		canon		151	442	22	44	0	6	335	35	3	109	13	39	89	18	21	66	40	96	48	184	0	0	109	57	12	200	0	106	95	80	80.6667
miR-375_0_-1	miR-375	TTTGTTCGTTCGGCTCGCGTG		3'trim		91	464	26	224	472	284	222	237	8	0	85	154	463	230	378	155	511	1106	755	748	128	181	33	0	55	264	186	237	75	217	266.3
miR-375_0_0	miR-375	TTTGTTCGTTCGGCTCGCGTGA		canon		209	430	25	2388	1874	1223	224	264	57	343	94	233	917	557	407	785	1131	1479	928	1098	396	16	240	541	35	636	220	129	556	293	590.933
miR-376c-3p_0_0	miR-376c-3p	AACATAGAGGAAATTCCACGT		canon		91	121	9	0	0	0	79	79	0	0	0	0	0	0	0	0	20	51	0	0	0	0	37	0	0	9	8	0	36	53	19.7667
miR-378a-3p_0_-1	miR-378a-3p	ACTGGACTTGGAGTCAGAAGG		3'trim		46	28	13	0	88	32	92	155	6	0	2	24	59	129	60	29	0	0	0	78	56	88	18	72	37	48	29	14	42	10	41.8333
miR-378a-3p_0_0	miR-378a-3p	ACTGGACTTGGAGTCAGAAGGC		canon		113	39	5	103	0	26	45	198	8	0	25	0	295	47	19	1	173	0	70	169	0	129	59	92	20	83	0	18	117	83	64.5667
miR-378a-3p_0_0	miR-378a-3p	ACTGGACTTGGAGTCAGAAGGA			22C>A	15	31	17	0	0	0	128	0	38	0	29	51	31	37	18	23	0	1	61	0	0	0	39	64	11	84	22	61	60	0	27.3667
miR-379-5p_0_0	miR-379-5p	TGGTAGACTATGGAACGTAGG		canon		92	195	11	1	0	0	100	103	0	0	7	113	0	0	46	0	83	0	29	0	0	0	0	0	0	52	0	0	0	0	27.7333
miR-382-3p_0_1	miR-382-3p	AATCATTCACGGACAACACTTT		3'temp		56	182	5	0	0	0	12	44	0	206	0	22	0	0	31	0	0	0	0	0	0	0	0	27	0	11	0	8	0	0	20.1333
miR-382-5p_0_-1	miR-382-5p	GAAGTTGTTCGTGGTGGATTC		3'trim		30	27	4	0	0	0	19	43	0	0	0	0	0	0	0	0	144	0	0	0	0	114	0	0	0	0	0	46	0	41	15.6
miR-382-5p_0_0	miR-382-5p	GAAGTTGTTCGTGGTGGATTCG		canon		87	236	15	63	78	0	173	186	15	0	32	0	115	22	2	51	0	31	72	0	0	81	59	78	0	103	28	0	0	0	50.9
miR-3940-3p_0_-1	miR-3940-3p	CAGCCCGGATCCCAGCCCACT		3'trim		39	0	12	0	0	0	47	0	6	148	22	0	0	11	0	0	0	115	0	91	9	0	31	0	64	29	11	0	44	0	22.6333
miR-409-3p_0_0	miR-409-3p	GAATGTTGCTCGGTGAACCCCT		canon		907	1728	61	519	357	29	538	628	88	449	153	387	961	156	72	87	234	335	845	559	26	102	164	235	54	762	142	44	50	64	357.867
miR-409-3p_1_0	miR-409-3p	CGAATGTTGCTCGGTGAACCCCT	5'temp			220	365	19	99	43	38	398	174	17	124	55	210	256	58	0	39	89	457	384	101	0	105	51	184	18	371	78	19	21	0	133.1
miR-410-3p_0_0	miR-410-3p	AATATAACACAGATGGCCTGT		canon		26	92	3	0	0	0	30	97	3	0	0	64	0	0	3	0	0	0	0	75	0	0	0	0	0	26	0	14	17	0	15
miR-411-5p_0_0	miR-411-5p	TAGTAGACCGTATAGCGTACG		canon		103	402	6	53	0	0	0	0	0	0	0	67	0	19	0	0	0	0	0	0	0	0	0	0	85	205	0	10	0	27	32.5667
miR-411-5p_1_0	miR-411-5p	ATAGTAGACCGTATAGCGTACG	5'temp			114	164	0	147	0	0	0	0	0	0	29	0	0	0	51	0	0	0	0	0	0	0	0	258	0	10	0	0	0	0	25.7667
miR-421_-1_0	miR-421	TCAACAGACATTAATTGGGCGC	5'trim			10	0	0	60	0	0	15	29	0	0	0	0	0	0	0	0	0	187	0	12	0	0	0	0	0	29	0	5	0	0	11.5667
miR-421_0_0	miR-421	ATCAACAGACATTAATTGGGCGT			23C>T	12	0	0	0	0	0	122	42	5	0	0	30	0	43	0	42	11	0	0	0	0	0	0	0	22	0	12	0	0	0	11.3667
miR-421_0_0	miR-421	ATCAACAGACATTAATTGGGCGC		canon		12	34	4	23	54	0	0	0	0	0	0	0	104	0	33	58	0	8	0	14	0	0	24	28	10	18	0	0	0	0	14.1333
miR-421_0_1	miR-421	ATCAACAGACATTAATTGGGCGCT		3'non-temp		0	0	6	0	42	0	56	50	3	0	0	0	58	18	14	0	47	0	0	1	50	0	0	0	0	52	0	0	0	0	13.2333
miR-423-3p_0_0	miR-423-3p	AGCTCGGTCTGAGGCCCCTCAGT		canon		7783	16612	757	8992	7883	2843	13583	10420	1216	7990	3563	6149	10264	3140	4061	4975	5811	9293	15771	6982	6902	16697	4835	9367	1977	10948	2705	2873	4234	3156	7059.4
miR-423-5p_0_-2	miR-423-5p	TGAGGGGCAGAGAGCGAGACT		3'trim		710	1082	829	4086	4809	8723	1231	946	805	908	1456	731	973	2613	965	991	1747	1108	1694	1439	1479	1026	668	1945	2622	828	1068	1301	739	900	1680.73
miR-423-5p_0_0	miR-423-5p	TGAGGGGCAGAGAGCGAGACTTT		canon		1815	3860	667	20345	15741	13385	3069	4286	1003	1977	1762	2442	3366	2811	2661	3318	3693	3655	5024	2763	3658	2037	2051	3598	1502	1758	1771	1899	2351	1449	3990.57
miR-424-3p_0_-1	miR-424-3p	CAAAACGTGAGGCGCTGCTA		3'trim		29	0	4	66	0	0	13	48	17	0	9	35	27	18	0	23	0	0	0	0	63	0	12	7	22	34	0	15	0	27	15.6333
miR-424-3p_0_-2	miR-424-3p	CAAAACGTGAGGCGCTGCT		3'trim		22	68	23	0	0	33	209	302	61	0	16	26	29	168	11	34	30	0	0	30	0	0	55	269	145	22	63	51	25	0	56.4
miR-424-3p_0_0	miR-424-3p	CAAAACGTGAGGCGCTGCTAT		canon		23	41	1	14	57	106	136	202	18	179	0	0	106	15	53	46	70	58	133	111	65	1	62	67	0	59	57	4	23	12	57.3
miR-424-5p_0_-1	miR-424-5p	CAGCAGCAATTCATGTTTTGA		3'trim		17	17	6	0	86	46	11	53	0	0	0	0	25	28	15	0	13	0	0	0	20	0	15	73	17	32	0	9	73	42	19.9333
miR-425-3p_1_-1	miR-425-3p	CATCGGGAATGTCGTGTCCGCC	5'temp	3'trim		31	0	6	47	0	19	0	0	18	0	18	20	33	10	46	1	126	114	77	0	0	138	14	0	14	44	31	1	0	0	26.9333
miR-425-3p_1_-3	miR-425-3p	CATCGGGAATGTCGTGTCCG	5'temp	3'trim		10	146	22	85	0	47	104	104	32	230	91	142	82	60	23	74	37	54	85	263	8	129	112	0	2	10	95	27	7	40	70.7
miR-425-5p_0_-1	miR-425-5p	AATGACACGATCACTCCCGTTG		3'trim		409	498	377	376	824	298	1063	949	486	287	272	300	715	1273	218	303	180	496	371	533	418	472	219	476	387	226	521	747	546	341	486.033
miR-425-5p_0_-3	miR-425-5p	AATGACACGATCACTCCCGT		3'trim		304	1226	271	379	725	190	808	843	374	338	371	559	313	541	289	367	392	982	1685	1521	1064	456	435	263	594	238	437	474	346	455	574.667
miR-425-5p_0_0	miR-425-5p	AATGACACGATCACTCCCGTTGA		canon		859	2204	544	952	667	810	1234	1402	1052	191	465	628	1687	1624	328	606	1019	383	1610	698	1011	987	523	872	612	677	849	597	489	706	876.2
miR-425-5p_0_2	miR-425-5p	AATGACACGATCACTCCCGTTGAGT		3'temp		1068	2889	119	616	211	71	1065	865	31	189	264	365	647	139	382	228	176	109	1632	302	89	463	461	290	230	1272	69	177	99	126	488.133
miR-4286_0_1	miR-4286	ACCCCACTCCTGGTACCA		3'temp		52	73	0	0	0	0	140	96	0	0	0	0	36	5	0	19	3	0	0	22	0	0	0	46	9	16	0	28	0	0	18.1667
miR-429_0_0	miR-429	TAATACTGTCTGGTAAAACCGT		canon		0	15	2	0	0	0	0	0	0	0	0	16	0	0	0	17	0	48	135	0	0	0	0	0	0	31	20	7	0	15	10.2
miR-431-5p_-1_0	miR-431-5p	GTCTTGCAGGCCGTCATGCA	5'trim			12	0	0	0	0	0	150	1	0	0	0	0	0	0	0	0	0	33	0	0	0	136	0	0	0	58	0	0	0	0	13
miR-431-5p_0_-1	miR-431-5p	TGTCTTGCAGGCCGTCATGC		3'trim		18	134	0	0	0	0	12	46	0	0	16	5	51	0	88	0	7	0	28	0	100	0	0	0	0	0	0	1	0	0	16.8667
miR-431-5p_0_0	miR-431-5p	TGTCTTGCAGGCCGTCATGCA		canon		34	294	1	85	0	0	0	0	0	193	0	124	67	25	0	0	0	0	0	91	0	0	0	0	0	0	0	0	27	0	31.3667
miR-432-5p_0_0	miR-432-5p	TCTTGGAGTAGGTCATTGGGTGG		canon		124	159	6	0	0	0	113	89	10	0	28	60	57	5	0	0	139	267	123	0	0	0	0	0	0	74	0	0	0	0	41.8
miR-4326_0_1	miR-4326	TGTTCCTCTGTCTCCCAGACT		3'temp		8	0	6	0	29	16	0	0	17	0	0	0	36	44	0	29	0	0	0	0	105	0	0	0	0	0	0	15	0	0	10.1667
miR-433-3p_0_0	miR-433-3p	ATCATGATGGGCTCCTCGGTGT		canon		54	290	0	0	0	35	24	72	6	0	25	0	67	0	5	0	0	15	25	0	55	0	0	0	0	9	0	0	1	0	22.7667
miR-4433b-3p_0_0	miR-4433b-3p	CAGGAGTGGGGGGTGGGACGT		canon		82	304	0	0	0	0	0	0	11	0	21	0	0	0	61	0	0	0	83	21	0	29	0	0	47	0	0	12	9	0	22.6667
miR-4433b-3p_1_0	miR-4433b-3p	ACAGGAGTGGGGGGTGGGACGT	5'temp			174	418	37	0	0	0	13	76	38	0	0	0	83	9	54	41	27	124	17	385	124	93	38	68	133	0	0	96	25	1	69.1333
miR-4433b-3p_1_0	miR-4433b-3p	ACAGGAGTCGGGGGTGGGACGT	5'temp		8G>C	0	0	0	213	0	67	37	124	8	125	14	76	1	0	75	158	274	0	0	0	0	0	0	0	0	165	52	0	0	0	46.3
miR-4433b-5p_-1_1	miR-4433b-5p	TGTCCCACCCCCACTCCTGTT	5'trim	3'temp		1274	1858	25	377	85	23	997	939	32	158	78	220	67	26	163	222	437	237	1034	302	0	1267	62	832	158	231	19	102	174	129	384.267
miR-4433b-5p_-1_2	miR-4433b-5p	TGTCCCACCCCCACTCCTGTTT	5'trim	3'temp		1555	1795	62	376	209	48	1364	1148	82	155	65	143	299	53	208	273	487	855	2351	433	94	1893	509	889	293	189	0	217	236	145	547.533
miR-4433b-5p_0_1	miR-4433b-5p	ATGTCCCACCCCCACTCCTGTT		3'temp		2463	3929	91	458	87	46	2198	1597	94	519	21	181	132	24	390	358	439	648	3806	850	205	5731	533	1274	371	400	11	179	242	223	916.667
miR-4446-3p_0_0	miR-4446-3p	CAGGGCTGGCAGTGACATGGGT		canon		56	0	6	0	0	0	8	29	0	0	16	14	71	0	0	46	0	0	0	0	219	9	0	0	19	104	0	11	62	9	22.6333
miR-4466_0_1	miR-4466	GGGTGCGGGCCGGCGGGGT		3'temp		0	0	0	36	0	0	0	0	12	18	16	0	51	9	28	34	24	208	0	1	0	0	35	96	0	0	0	7	0	0	19.1667
miR-4508_1_-2	miR-4508	AGCGGGGCTGGGCGCG	5'temp	3'trim		83	0	30	0	59	115	103	131	96	132	97	0	86	130	27	48	58	259	66	63	0	140	45	45	59	63	86	130	152	124	80.9
miR-4508_1_0	miR-4508	AGCGGGGCTGGGCGCGCG	5'temp			62	87	0	89	0	5	15	48	26	29	58	24	62	63	0	27	10	0	0	82	0	8	0	0	35	0	2	95	56	15	29.9333
miR-450b-5p_0_-1	miR-450b-5p	TTTTGCAATATGTTCCTGAAT		3'trim		87	134	8	131	0	5	222	122	15	0	23	24	158	8	0	40	215	39	322	35	37	0	81	20	24	42	69	40	0	0	63.3667
miR-450b-5p_0_1	miR-450b-5p	TTTTGCAATATGTTCCTGAATAT		3'temp		0	71	0	55	0	0	0	0	0	0	0	0	0	0	0	0	0	22	0	92	0	104	0	0	5	0	8	0	0	18	12.5
miR-451a_0_-1	miR-451a	AAACCGTTACCATTACTGAGT		3'trim		278983	258594	458446	278938	230280	636922	345207	288755	459703	188896	375865	160574	230517	769077	147226	99131	208905	303115	287377	225086	513907	374792	171474	137204	401503	153861	499481	452468	244476	218020	313293
miR-451a_0_0	miR-451a	AAACCGTTACCATTACTGAGTT		canon		52680	53809	72376	44802	46823	107168	64660	49876	57872	44033	82616	32964	54064	154319	35223	23728	39335	63377	58561	46894	92564	63373	35437	31810	62322	31438	85059	110913	62776	58208	60636
miR-454-3p_0_0	miR-454-3p	TAGTGCAATATTGCTTATAGGGT		canon		447	456	203	43	0	0	511	564	520	61	343	214	889	483	590	178	542	611	373	459	1983	58	67	0	92	358	422	723	176	325	389.7
miR-454-3p_0_1	miR-454-3p	TAGTGCAATATTGCTTATAGGGTT		3'temp		809	1145	30	44	0	81	531	256	196	4	250	278	770	169	329	239	525	446	785	646	1117	376	140	205	50	487	55	417	10	261	355.033
miR-4685-3p_0_-2	miR-4685-3p	TCTCCCTTCCTGCCCTGGCT		3'trim		0	66	23	0	48	30	95	91	113	73	23	11	51	43	51	0	41	0	0	0	60	0	0	0	12	0	43	25	34	17	31.6667
miR-4732-3p_0_-1	miR-4732-3p	GCCCTGACCTGTCCTGTTCT		3'trim		128	249	106	178	168	363	147	126	250	62	223	23	0	391	155	50	44	196	95	25	294	530	58	170	241	87	384	34	3	68	161.6
miR-4732-3p_0_0	miR-4732-3p	GCCCTGACCTGTCCTGTTCTG		canon		161	23	223	266	145	630	144	25	534	0	365	358	158	682	111	92	250	154	237	33	849	389	152	82	376	166	218	286	80	238	247.567
miR-4742-3p_0_-1	miR-4742-3p	TCTGTATTCTCCTTTGCCTGCA		3'trim		0	0	9	0	0	0	0	0	0	0	10	43	0	20	0	29	11	147	0	0	39	0	0	0	4	63	0	26	0	0	13.3667
miR-483-3p_-1_2	miR-483-3p	CACTCCTCTCCTCCCGTCTTCT	5'trim	3'temp		33	114	21	209	0	24	415	233	13	6	42	90	177	88	37	134	117	154	451	143	109	394	76	24	57	35	22	33	24	6	109.367
miR-483-3p_0_0	miR-483-3p	TCACTCCTCTCCTCCCGTCTT		canon		5	122	0	55	127	26	184	70	0	0	0	65	42	1	59	80	67	409	77	41	55	346	0	72	0	24	8	0	0	15	65
miR-483-5p_-1_3	miR-483-5p	AGACGGGAGGAAAGAAGGGAGTGG	5'trim	3'temp		0	9	1	30	0	0	78	79	0	0	0	0	24	18	2	0	0	40	100	17	7	1	39	1	0	0	22	53	51	44	20.5333
miR-483-5p_0_0	miR-483-5p	AAGACGGGAGGAAAGAAGGGAG		canon		22	208	7	32	0	78	47	222	3	0	42	43	172	69	12	58	41	161	32	172	186	60	60	152	85	29	20	5	253	23	76.4667
miR-484_0_-1	miR-484	TCAGGCTCAGTCCCCTCCCGA		3'trim		926	875	1067	900	1240	3182	1141	881	1704	1487	1076	694	635	2553	719	223	700	911	455	1047	1789	2093	543	429	1487	514	1337	1674	730	883	1129.83
miR-484_0_-2	miR-484	TCAGGCTCAGTCCCCTCCCG		3'trim		190	159	278	426	304	787	195	110	382	217	246	10	121	758	267	22	169	49	56	64	191	400	158	145	264	36	506	238	168	193	236.967
miR-485-3p_0_0	miR-485-3p	GTCATACACGGCTCTCCTCTCT		canon		567	852	14	59	0	16	484	562	25	39	24	16	83	44	150	54	47	0	112	160	6	9	0	0	17	338	38	4	0	0	124
miR-486-3p_0_-1	miR-486-3p	CGGGGCAGCTCAGTACAGGA		3'trim		124	491	175	266	0	416	138	260	338	58	305	17	237	697	198	74	506	431	142	39	723	2	0	221	631	218	377	421	356	178	267.967
miR-486-3p_0_0	miR-486-3p	CGGGGCAGCTCAGTACAGGAT		canon		1269	1461	674	1124	221	1213	933	1268	1390	250	943	625	990	2420	1976	1145	1517	1902	1076	1043	3772	404	260	694	1174	636	1190	2327	1206	1122	1207.5
miR-486-3p_0_1	miR-486-3p	CGGGGCAGCTCAGTACAGGATT		3'non-temp		448	876	167	238	64	256	103	103	465	71	188	147	295	228	538	600	560	325	518	342	722	195	193	61	303	276	253	626	222	234	320.567
miR-486-5p_0_-1	miR-486-5p	TCCTGTACTGAGCTGCCCCGA		3'trim		42179	33283	42856	33052	42767	122053	79031	61776	110619	51686	60921	28166	37730	146888	62178	25831	50114	87780	61066	48435	195674	72003	24165	26221	67864	27695	83910	69598	22674	40474	61956.3
miR-486-5p_0_0	miR-486-5p	TCCTGTACTGAGCTGCCCCGAG		canon		52663	44194	51505	54491	62253	177027	93668	78567	141743	51545	85060	38317	61017	230536	90954	38931	71711	111367	92213	64010	262943	85695	41192	40686	101193	37961	108955	88976	34672	51004	84835
miR-486-5p_0_1	miR-486-5p	TCCTGTACTGAGCTGCCCCGAGA		3'non-temp		17758	13959	13296	25879	27510	75758	36396	31029	52775	22604	28247	13959	22539	74353	33873	15489	29891	42061	36026	26200	109712	26241	10328	12668	26737	15920	40719	29215	9914	16817	31262.4
miR-487b-3p_-2_1	miR-487b-3p	TCGTACAGGGTCATCCACTTT	5'trim	3'temp		79	26	19	32	0	0	17	54	0	0	3	31	0	0	50	3	0	0	0	0	5	0	0	0	0	0	0	24	0	20	12.1
miR-487b-3p_0_0	miR-487b-3p	AATCGTACAGGGTCATCCACTT		canon		566	777	48	54	65	77	345	979	17	125	80	170	497	31	46	20	0	89	81	30	51	0	0	0	42	341	0	0	14	2	151.567
miR-487b-3p_0_1	miR-487b-3p	AATCGTACAGGGTCATCCACTTT		3'temp		134	293	7	0	0	0	40	146	7	105	11	22	21	6	0	0	0	84	158	1	0	0	0	0	0	59	7	0	21	0	37.4
miR-494-3p_0_1	miR-494-3p	TGAAACATACACGGGAAACCTCT		3'temp		124	312	4	71	0	0	169	262	7	0	14	31	55	14	23	0	66	0	18	62	1	0	0	0	16	138	0	2	0	39	47.6
miR-495-3p_0_0	miR-495-3p	AAACAAACATGGTGCACTTCTT		canon		25	211	3	0	0	0	40	0	0	67	17	0	18	24	6	24	112	0	170	0	0	0	0	0	0	120	0	0	14	0	28.3667
miR-495-3p_0_1	miR-495-3p	AAACAAACATGGTGCACTTCTTT		3'temp		129	158	10	0	0	0	73	29	0	0	32	0	153	0	0	34	10	0	0	0	0	0	0	0	0	18	2	0	0	7	21.8333
miR-497-5p_0_0	miR-497-5p	CAGCAGCACACTGTGGTTTGT		canon		0	0	0	20	0	0	0	0	4	0	38	0	31	0	0	0	0	65	0	34	0	0	23	160	0	40	0	1	35	14	15.5
miR-499a-5p_0_-1	miR-499a-5p	TTAAGACTTGCAGTGATGTT		3'trim		0	15	7	32	0	50	5	13	0	0	0	0	186	14	0	0	0	4	0	1	0	0	0	0	0	32	17	53	0	0	14.3
miR-499a-5p_0_0	miR-499a-5p	TTAAGACTTGCAGTGATGTTT		canon		59	124	17	49	119	7	154	79	5	0	27	0	22	2	3	44	30	53	188	285	0	0	0	1	0	61	41	39	52	39	50
miR-500a-3p_0_-1	miR-500a-3p	ATGCACCTGGGCAAGGATTCT		3'trim		20	22	0	96	338	75	65	117	12	0	0	22	0	0	68	0	0	0	64	0	41	0	39	0	0	18	0	97	0	45	37.9667
miR-500a-3p_0_-3	miR-500a-3p	ATGCACCTGGGCAAGGATT		3'trim		29	234	68	0	0	3	99	102	56	334	131	117	85	104	62	34	241	0	390	427	72	9	38	136	142	32	122	244	160	18	116.3
miR-501-3p_0_-1	miR-501-3p	AATGCACCCGGGCAAGGATTC		3'trim		48	516	37	0	0	1	384	469	91	424	194	112	207	219	342	187	221	286	446	350	622	834	155	67	232	258	144	335	191	340	257.067
miR-501-3p_0_-2	miR-501-3p	AATGCACCCGGGCAAGGATT		3'trim		59	122	180	136	0	139	509	287	237	73	236	194	258	443	175	49	181	643	179	231	672	419	164	154	397	160	274	163	182	184	236.667
miR-501-3p_0_0	miR-501-3p	AATGCACCCGGGCAAGGATTCT		canon		60	491	18	749	456	405	59	250	53	182	76	214	253	104	55	247	247	523	642	736	159	202	262	477	53	361	120	77	357	116	266.8
miR-501-5p_0_2	miR-501-5p	AATCCTTTGTCCCTGGGTGAGAGT		3'temp		0	23	6	0	0	0	0	0	7	0	0	0	0	0	41	5	0	51	0	0	124	0	0	0	0	0	10	28	37	44	12.5333
miR-502-3p_0_-1	miR-502-3p	AATGCACCTGGGCAAGGATTC		3'trim		190	1397	184	186	27	97	1086	553	251	883	151	435	380	444	541	568	315	333	744	654	582	153	698	418	370	231	445	567	589	66	451.267
miR-502-3p_0_-2	miR-502-3p	AATGCACCTGGGCAAGGATT		3'trim		309	702	573	304	0	158	1309	722	429	335	499	665	331	1197	558	397	583	486	840	880	570	101	496	268	438	240	767	1078	748	614	553.233
miR-503-5p_0_-2	miR-503-5p	TAGCAGCGGGAACAGTTCTGA		3'trim	21C>A	38	57	24	0	0	110	68	1	36	0	0	0	67	176	4	18	76	172	0	0	0	0	31	0	22	50	48	21	0	44	35.4333
miR-503-5p_0_-3	miR-503-5p	TAGCAGCGGGAACAGTTCTG		3'trim		48	113	15	133	130	31	84	67	21	0	41	0	56	31	35	17	0	0	67	15	0	0	0	0	12	29	32	0	0	11	32.9333
miR-503-5p_0_-4	miR-503-5p	TAGCAGCGGGAACAGTTCT		3'trim		0	0	16	0	103	54	0	0	17	0	0	40	0	18	20	20	0	0	0	0	0	0	0	32	0	36	0	61	0	0	13.9
miR-505-3p_0_-3	miR-505-3p	CGTCAACACTTGCTGGTTT		3'trim		91	123	58	66	212	40	12	35	80	75	71	27	137	239	13	49	62	1	309	366	6	0	62	177	59	55	112	24	0	51	87.0667
miR-505-3p_0_0	miR-505-3p	CGTCAACACTTGCTGGTTTCCT		canon		30	229	8	216	158	95	373	288	39	92	26	52	234	190	42	39	146	68	7	67	62	1	74	29	24	131	21	82	37	89	98.3
miR-511-5p_0_0	miR-511-5p	GTGTCTTTTGCTCTGCAGTCA		canon		94	130	14	156	86	73	452	221	42	0	0	86	49	43	71	293	117	44	328	308	37	47	248	199	26	21	6	91	181	79	118.067
miR-532-3p_0_-1	miR-532-3p	CCTCCCACACCCAAGGCTTGC		3'trim		0	34	0	5	13	0	0	0	9	0	5	0	59	0	6	18	0	0	102	1	0	0	0	0	6	0	0	13	52	0	10.7667
miR-532-3p_0_-2	miR-532-3p	CCTCCCACACCCAAGGCTTG		3'trim		13	182	19	0	84	36	33	105	18	0	0	27	0	26	0	0	0	60	154	51	30	0	0	138	31	0	59	3	10	51	37.6667
miR-532-5p_-1_0	miR-532-5p	ATGCCTTGAGTGTAGGACCGT	5'trim			82	329	61	19	67	28	194	328	74	0	133	161	61	122	142	46	133	183	90	383	91	0	145	194	40	98	211	55	133	338	131.367
miR-532-5p_0_0	miR-532-5p	CATGCCTTGAGTGTAGGACCGT		canon		586	1425	292	136	132	149	1508	1649	617	450	391	651	1113	1095	719	686	1200	840	877	1300	465	522	373	895	571	912	753	608	715	471	736.7
miR-542-3p_0_-2	miR-542-3p	TGTGACAGATTGATAACTGA		3'trim		4	0	1	0	0	0	0	0	0	0	32	28	77	0	0	46	0	0	2	0	61	0	0	55	31	25	0	0	0	0	12.0667
miR-543_0_0	miR-543	AAACATTCGCGGTGCACTTCTT		canon		134	206	6	0	0	0	263	198	10	0	23	74	95	0	5	30	69	0	2	26	1	260	0	31	5	54	15	4	155	8	55.8
miR-543_0_1	miR-543	AAACATTCGCGGTGCACTTCTTT		3'temp		188	408	11	0	0	18	84	27	0	0	13	92	0	2	4	31	65	64	66	65	54	0	7	0	3	105	26	0	0	0	44.4333
miR-550a-3-5p@_0_1	miR-550a-3-5p@	AGTGCCTGAGGGAGTAAGAGC		3'temp		0	0	5	105	0	20	0	0	9	222	0	0	25	14	0	0	0	0	0	36	0	0	0	0	23	0	29	0	0	0	16.2667
miR-556-5p_0_-1	miR-556-5p	GATGAGCTCATTGTAATATGA		3'trim		47	0	3	0	0	0	26	92	0	0	11	0	0	18	0	0	0	0	0	0	0	0	0	0	0	52	15	0	40	27	11.0333
miR-574-3p_0_-1	miR-574-3p	CACGCTCATGCACACACCCAC		3'trim		90	74	2	135	23	0	6	46	27	0	0	53	0	59	0	34	46	36	41	72	0	1	0	0	0	0	50	24	82	0	30.0333
miR-574-3p_0_-2	miR-574-3p	CACGCTCATGCACACACCCA		3'trim		29	0	7	0	90	15	27	110	0	0	20	88	35	37	81	40	46	0	124	0	0	0	5	0	12	0	17	0	10	10	26.7667
miR-574-3p_0_0	miR-574-3p	CACGCTCATGCACACACCCACA		canon		202	287	11	66	89	11	404	244	81	188	4	68	237	92	49	131	233	51	174	236	70	193	105	111	45	207	119	20	36	93	128.567
miR-574-5p_-1_-2	miR-574-5p	GAGTGTGTGTGTGTGAGTGT	5'trim	3'trim		26	40	1	115	0	0	30	102	5	0	0	21	0	0	54	0	0	0	0	0	0	0	0	0	0	0	0	0	0	13	13.5667
miR-574-5p_0_-2	miR-574-5p	TGAGTGTGTGTGTGTGAGTGT		3'trim		0	122	22	0	0	21	0	0	29	0	0	25	0	45	31	38	51	31	247	122	55	0	34	0	0	0	21	9	48	26	32.5667
miR-574-5p_0_0	miR-574-5p	TGAGTGTGTGTGTGTGAGTGTGT		canon		30	139	8	0	0	24	10	43	0	43	21	0	76	30	0	27	75	0	0	0	182	0	0	146	0	65	32	19	40	23	34.4333
miR-584-5p_0_-1	miR-584-5p	TTATGGTTTGCCTGGGACTGA		3'trim		255	421	29	259	0	46	300	263	46	0	1	118	97	84	28	45	148	53	95	1	127	0	44	103	14	143	54	67	35	21	96.5667
miR-589-5p_0_-1	miR-589-5p	TGAGAACCACGTCTGCTCTGA		3'trim		0	35	3	6	0	7	0	0	20	54	0	0	0	14	46	0	0	0	0	0	10	49	6	0	16	32	37	9	26	51	14.0333
miR-598-3p_0_0	miR-598-3p	TACGTCATCGTTGTCATCGTCA		canon		0	55	3	0	0	31	20	71	0	0	12	0	0	20	0	0	0	0	0	0	58	0	0	0	0	75	0	0	0	0	11.5
miR-6087_-2_0	miR-6087	AGGCGGGGGGGCGAGC	5'trim			0	0	0	0	85	0	0	0	11	153	6	0	10	0	16	9	0	0	45	112	64	0	0	12	25	0	0	19	33	18	20.6
miR-6087_-2_1	miR-6087	AGGCGGGGGGGCGAGCC	5'trim	3'temp		31	31	3	213	1	0	8	21	10	1	0	49	75	18	33	7	16	126	67	0	0	0	0	0	24	0	0	12	21	0	25.5667
miR-6087_-2_2	miR-6087	AGGCGGGGGGGCGAGCCC	5'trim	3'temp		0	46	1	28	270	0	34	101	43	285	33	182	160	62	12	180	116	32	110	177	33	367	187	50	73	108	0	27	46	46	93.6333
miR-615-3p_0_-1	miR-615-3p	TCCGAGCCTGGGTCTCCCTCT		3'trim		0	81	0	0	0	0	46	0	0	0	0	0	0	0	0	0	0	0	124	0	229	0	31	69	0	0	15	7	0	0	20.0667
miR-625-3p_-1_0	miR-625-3p	ACTATAGAACTTTCCCCCTCA	5'trim			58	27	2	0	49	78	0	0	11	0	0	0	0	16	48	0	0	1	54	0	15	186	40	0	4	16	15	0	0	58	22.6
miR-625-3p_0_0	miR-625-3p	GACTATAGAACTTTCCCCCTCA		canon		173	104	25	152	0	60	503	440	80	45	8	69	83	69	86	216	101	346	191	68	184	219	24	0	21	115	103	17	71	0	119.1
miR-629-5p_0_0	miR-629-5p	TGGGTTTACGTTGGGAGAACT		canon		66	259	56	13	97	106	498	95	139	111	269	114	316	408	195	50	154	395	132	244	75	0	157	32	226	27	406	229	110	73	168.4
miR-6511a-3p_0_1	miR-6511a-3p	CCTCACCATCCCTTCTGCCTGCA		3'temp		38	88	2	0	0	37	15	63	53	0	3	37	60	93	52	0	8	82	0	63	26	0	21	34	26	68	71	28	16	0	32.8
miR-6511b-3p_0_-1	miR-6511b-3p	CCTCACCACCCCTTCTGCCTGC		3'trim		0	0	3	0	0	17	0	0	3	0	0	34	0	0	0	0	42	89	0	0	0	139	0	0	0	0	30	9	0	0	12.2
miR-6511b-3p_0_0	miR-6511b-3p	CCTCACCACCCCTTCTGCCTGCA		canon		17	25	3	0	0	53	17	82	8	0	9	0	27	5	7	5	0	143	65	105	49	0	31	1	12	1	17	0	12	0	23.1333
miR-652-3p_0_-1	miR-652-3p	AATGGCGCCACTAGGGTTGT		3'trim		555	1086	690	492	427	623	1016	676	935	357	880	497	524	1554	375	109	232	842	762	1225	991	663	494	303	668	217	736	1139	822	457	678.233
miR-652-3p_0_0	miR-652-3p	AATGGCGCCACTAGGGTTGTG		canon		384	1216	269	815	448	679	291	417	303	695	483	218	777	1005	355	126	328	267	447	221	274	89	187	269	310	472	216	714	536	585	446.533
miR-652-3p_0_1	miR-652-3p	AATGGCGCCACTAGGGTTGTGT		3'non-temp		737	1234	205	2214	1153	1156	875	1004	260	425	263	230	1561	655	188	284	423	520	1227	858	555	205	260	414	276	683	301	381	375	240	638.733
miR-654-3p_0_-1	miR-654-3p	TATGTCTGCTGACCATCACCT		3'trim		18	1	0	0	0	0	34	126	0	0	58	0	0	0	0	4	0	0	61	0	0	0	0	0	0	0	0	0	0	0	10.0667
miR-660-5p_0_0	miR-660-5p	TACCCATTGCATATCGGAGTTG		canon		48	0	0	0	0	42	312	55	3	0	2	0	0	11	0	23	0	0	0	78	0	0	0	0	12	1	0	10	78	1	22.5333
miR-660-5p_0_1	miR-660-5p	TACCCATTGCATATCGGAGTTGT		3'temp		30	141	25	47	499	0	47	37	44	0	53	0	195	62	9	31	89	190	109	0	38	0	40	49	0	45	21	59	2	76	64.6
miR-664a-5p_0_-2	miR-664a-5p	ACTGGCTAGGGAAAATGATTGG		3'trim		40	0	5	0	0	12	0	0	11	0	18	0	65	6	15	20	59	0	0	9	0	0	0	0	17	5	0	0	87	5	12.4667
miR-6734-5p_0_-1	miR-6734-5p	TTGAGGGGAGAATGAGGTGGAG		3'trim		0	30	7	0	0	52	0	0	0	0	0	0	67	0	0	16	0	0	0	0	0	0	0	0	53	16	12	48	0	10	10.3667
miR-6803-3p_0_-1	miR-6803-3p	TCCCTCGCCTTCTCACCCTCA		3'trim		91	114	68	218	256	197	316	198	174	237	97	152	118	221	187	159	146	282	513	395	85	1010	0	0	146	30	240	207	148	195	206.667
miR-6803-3p_0_0	miR-6803-3p	TCCCTCGCCTTCTCACCCTCAG		canon		53	321	15	255	95	100	234	256	100	0	16	50	135	61	20	60	199	0	441	69	319	254	13	56	31	14	129	80	62	41	115.967
miR-6852-5p_0_0	miR-6852-5p	CCCTGGGGTTCTGAGGACATG		canon		51	74	4	0	0	0	189	77	0	121	29	0	35	0	0	0	0	0	0	80	0	0	18	0	0	135	0	0	0	0	27.1
miR-7-5p_0_-1	miR-7-5p	TGGAAGACTAGTGATTTTGTTG		3'trim		33	73	206	33	102	143	337	296	269	65	226	66	96	806	124	144	197	396	139	227	517	256	138	113	160	87	174	206	66	104	193.3
miR-7-5p_0_-3	miR-7-5p	TGGAAGACTAGTGATTTTGT		3'trim		58	106	98	204	351	77	178	197	107	0	113	159	146	240	92	102	65	288	208	212	155	240	52	90	42	28	132	39	99	60	131.267
miR-7-5p_0_0	miR-7-5p	TGGAAGACTAGTGATTTTGTTGT		canon		220	183	286	410	0	333	391	322	427	658	446	76	391	784	240	101	441	111	481	619	1004	50	216	361	333	129	419	302	170	189	336.433
miR-7-5p_0_1	miR-7-5p	TGGAAGACTAGTGATTTTGTTGTT		3'temp		103	491	27	0	0	21	236	370	37	44	52	65	124	107	149	170	471	50	225	49	159	281	193	340	93	46	42	30	16	50	134.7
miR-744-5p_0_-1	miR-744-5p	TGCGGGGCTAGGGCTAACAGC		3'trim		69	44	2	0	0	51	0	0	0	0	0	0	97	14	17	35	101	219	272	0	5	0	0	18	0	32	26	0	0	0	33.4
miR-744-5p_0_-2	miR-744-5p	TGCGGGGCTAGGGCTAACAG		3'trim		21	0	4	0	0	0	77	0	0	0	0	0	36	0	4	0	10	52	0	66	55	0	58	0	42	24	0	25	44	9	17.5667
miR-744-5p_0_0	miR-744-5p	TGCGGGGCTAGGGCTAACAGCA		canon		25	218	0	0	0	0	46	79	14	0	8	0	96	0	15	12	70	0	0	0	0	0	0	31	0	77	0	0	0	0	23.0333
miR-760_0_1	miR-760	CGGCTCTGGGTCTGTGGGGAG		3'temp		0	0	0	0	0	50	0	0	3	291	0	0	0	16	1	11	0	0	0	0	0	0	0	0	0	0	0	11	32	0	13.8333
miR-760_0_2	miR-760	CGGCTCTGGGTCTGTGGGGAGT		3'non-temp		36	10	3	182	0	25	0	0	3	169	38	0	0	0	101	0	57	174	0	0	0	0	7	0	0	0	0	0	33	24	28.7333
miR-769-5p_0_-1	miR-769-5p	TGAGACCTCTGGGTTCTGAGC		3'trim		0	23	0	0	224	0	104	11	0	0	0	0	0	26	48	0	0	0	0	0	0	0	0	0	0	0	32	0	0	0	15.6
miR-769-5p_0_0	miR-769-5p	TGAGACCTCTGGGTTCTGAGCT		canon		0	0	8	0	0	0	0	0	0	0	5	29	0	0	68	10	0	0	0	108	0	50	0	42	24	0	18	0	66	25	15.1
miR-7976_0_-1	miR-7976	TGCCCTGAGACTTTTGCT		3'trim		0	0	18	0	0	18	0	0	60	75	0	0	53	141	0	0	0	0	58	28	33	127	16	113	85	0	76	30	0	0	31.0333
miR-7976_0_1	miR-7976	TGCCCTGAGACTTTTGCTCT		3'temp		16	0	5	0	0	27	129	0	29	0	56	0	0	89	0	0	8	203	0	0	210	0	45	0	5	0	20	0	0	39	29.3667
miR-7976_0_2	miR-7976	TGCCCTGAGACTTTTGCTCTA		3'temp		15	0	22	12	0	0	24	12	9	0	14	0	0	60	0	12	0	0	0	0	29	0	0	0	25	0	24	26	7	36	10.9
miR-7977_0_0	miR-7977	TTCCCGGCCAACGCACCA			6A>G	23	172	0	0	0	0	2	6	0	70	8	0	25	1	0	0	23	0	0	0	0	104	0	0	0	68	8	0	9	9	17.6
miR-873-5p_1_-3	miR-873-5p	TGCAGGAACTTGTGAGTCT	5'temp	3'trim		27	0	0	0	208	0	105	189	0	0	0	0	68	11	0	43	16	0	0	0	0	0	0	0	0	0	0	0	0	0	22.2333
miR-874-3p_0_2	miR-874-3p	CTGCCCTGGCCCGAGGGACCGACT		3'temp		22	0	0	0	134	0	0	0	0	0	0	0	0	0	0	0	0	0	46	0	0	280	0	40	0	0	0	0	0	0	17.4
miR-885-3p_0_-1	miR-885-3p	AGGCAGCGGGGTGTAGTGGAT		3'trim		22	20	9	0	0	23	0	0	0	174	14	62	264	0	20	0	0	212	0	0	0	0	0	0	0	30	0	0	0	0	28.3333
miR-885-5p_0_0	miR-885-5p	TCCATTACACTACCCTGCCTCT		canon		518	1292	76	487	460	255	2062	790	243	1214	191	747	2673	820	598	476	716	1141	1513	538	407	1045	284	108	212	212	147	93	155	264	657.9
miR-889-3p_0_0	miR-889-3p	TTAATATCGGACAACCATTGT		canon		153	134	5	54	0	0	0	0	0	0	13	41	48	0	0	0	9	0	62	48	0	95	0	0	0	24	0	0	0	0	22.8667
miR-92a-3p_0_0	miR-92a-3p	TATTGCACTTGTCCCGGCCTGT		canon		55738	78955	42222	52861	35855	96547	105455	87781	107144	41037	37566	34874	74659	110561	57510	39043	71187	90733	90454	54571	128942	104880	26695	22816	43512	40239	69089	53084	22474	39387	63862.4
miR-92b-3p_0_-2	miR-92b-3p	TATTGCACTCGTCCCGGCCT		3'trim		32	36	6	0	0	27	235	0	37	1	17	18	175	55	17	55	37	227	55	193	0	0	2	0	18	68	47	63	0	1	47.4
miR-92b-3p_0_0	miR-92b-3p	TATTGCACTCGTCCCGGCCTCC		canon		38	127	12	185	133	29	29	89	8	0	13	26	129	37	70	118	43	169	287	46	234	202	2	96	0	129	2	0	36	54	78.1
miR-93-3p_0_1	miR-93-3p	ACTGCTGAGCTAGCACTTCCCGA		3'temp		0	85	2	0	0	0	0	0	7	0	0	0	98	27	46	0	0	0	0	0	279	0	0	0	30	0	0	0	1	23	19.9333
miR-93-5p_0_0	miR-93-5p	CAAAGTGCTGTTCGTGCAGGTAG		canon		1207	1146	981	1488	1172	2134	1405	1950	1717	601	800	394	1945	2708	1166	1030	1586	1200	1418	958	1859	500	520	495	827	724	1311	2080	749	795	1228.87
miR-939-5p_0_0	miR-939-5p	TGGGGAGCTGAGGCTCTGGGGGTG		canon		0	0	2	0	0	20	0	0	7	0	0	0	41	44	0	2	0	0	0	0	0	208	0	0	19	39	0	0	0	0	12.7333
miR-941_0_-2	miR-941	CACCCGGCTGTGTGCACATGT		3'trim		6	25	10	0	0	97	112	0	8	0	0	0	50	35	0	21	0	0	110	78	369	0	11	0	17	11	67	0	0	29	35.2
miR-941_0_-3	miR-941	CACCCGGCTGTGTGCACATG		3'trim		0	0	11	12	92	0	20	0	37	0	70	0	0	79	0	11	7	119	0	106	115	0	0	0	0	48	60	9	23	0	27.3
miR-941_0_0	miR-941	CACCCGGCTGTGTGCACATGTGC		canon		88	0	4	128	0	0	0	0	0	0	39	0	121	29	5	24	16	0	0	0	31	92	72	0	0	85	26	0	0	29	26.3
miR-942-5p_-2_1	miR-942-5p	TTCTCTGTTTTGGCCATGTGT	5'trim	3'temp		15	0	16	0	0	49	0	0	38	0	22	56	125	59	25	23	0	0	0	83	76	0	0	0	0	82	0	63	2	0	24.4667
miR-942-5p_-2_3	miR-942-5p	TTCTCTGTTTTGGCCATGTGTGT	5'trim	3'temp		42	90	4	0	0	0	25	0	22	0	0	0	53	88	0	0	36	0	0	0	0	0	0	38	6	0	37	0	11	14	15.5333
miR-942-5p_0_1	miR-942-5p	TCTTCTCTGTTTTGGCCATGTGA		3'non-temp		15	83	38	47	0	30	16	56	36	82	8	5	89	14	0	37	57	0	55	0	183	0	0	0	29	17	47	24	24	29	34.0333
miR-942-5p_0_1	miR-942-5p	TCTTCTCTGTTTTGGCCATGTGT		3'temp		32	0	2	0	0	0	95	0	0	0	28	0	75	11	9	0	0	0	0	1	0	0	1	0	0	47	13	0	0	56	12.3333
miR-95-3p_0_-1	miR-95-3p	TTCAACGGGTATTTATTGAGC		3'trim		31	45	6	84	0	47	42	74	0	0	0	0	0	20	0	50	0	0	97	0	0	183	0	0	0	30	0	3	0	25	24.5667
miR-95-3p_0_-2	miR-95-3p	TTCAACGGGTATTTATTGAG		3'trim		16	66	0	0	0	0	28	86	0	189	0	0	0	6	60	44	0	60	0	0	0	130	69	0	0	22	23	0	17	0	27.2
miR-95-3p_0_0	miR-95-3p	TTCAACGGGTATTTATTGAGCA		canon		56	0	2	0	0	0	140	0	0	0	0	15	0	0	40	0	64	0	42	0	0	0	33	0	0	0	0	26	12	0	14.3333
miR-96-5p_0_-2	miR-96-5p	TTTGGCACTAGCACATTTTTG		3'trim		40	67	5	26	0	19	0	0	25	0	14	0	95	124	0	0	0	0	0	179	0	0	54	56	29	0	44	27	0	0	26.8
miR-98-5p_0_-1	miR-98-5p	TGAGGTAGTAAGTTGTATTGT		3'trim		68	218	35	156	0	458	96	262	51	0	60	53	68	55	22	0	173	73	0	154	0	0	0	0	124	41	119	158	33	153	87.6667
miR-98-5p_0_-2	miR-98-5p	TGAGGTAGTAAGTTGTATTG		3'trim		15	0	33	156	0	65	24	70	43	0	77	0	2	92	40	2	66	0	0	0	52	0	0	0	28	0	43	107	0	58	32.4333
miR-98-5p_0_0	miR-98-5p	TGAGGTAGTAAGTTGTATTGTT		canon		695	863	24	1122	134	130	149	235	16	218	52	62	478	0	226	110	265	0	522	99	0	366	126	242	31	356	0	74	0	117	223.733
miR-99a-5p_0_-1	miR-99a-5p	AACCCGTAGATCCGATCTTGT		3'trim		780	3680	272	3456	3721	950	3947	2651	493	2962	685	2943	3193	1832	1051	1813	2961	4935	6080	4429	1707	1778	1305	2082	586	1127	726	591	1390	1327	2181.77
miR-99a-5p_0_-2	miR-99a-5p	AACCCGTAGATCCGATCTTG		3'trim		1113	3972	323	5853	3215	1300	3089	3180	556	3255	616	2089	3603	1605	1427	2348	4453	7960	6510	6191	2519	3244	1920	2104	809	1403	904	781	1412	1665	2647.3
miR-99b-5p_0_-1	miR-99b-5p	CACCCGTAGAACCGACCTTGC		3'trim		375	841	34	799	427	348	652	406	82	352	42	208	229	199	63	86	286	387	1096	573	208	702	253	277	97	440	121	76	210	215	336.133
miR-99b-5p_0_-2	miR-99b-5p	CACCCGTAGAACCGACCTTG		3'trim		190	506	37	369	737	290	764	501	73	70	95	265	268	149	159	311	245	664	1014	655	282	154	181	537	37	190	150	36	223	225	312.567
miR-99b-5p_0_0	miR-99b-5p	CACCCGTAGAACCGACCTTGCG		canon		1737	3937	164	1440	781	438	1010	1254	123	512	590	1212	1173	316	443	574	774	1576	1833	998	1076	2225	1058	1268	445	856	235	96	499	494	971.233
