# Supplementary material for: The Impact of the Anticoagulant Type in Blood Collection Tubes on Circulating Extracellular Plasma MicroRNA Profiles Revealed by Small RNA Sequencing
Source: Int J Mol Sci. 2022 Sep 7;23(18):10340. doi: 10.3390/ijms231810340 (PMC9499385; doi:10.3390/ijms231810340)
Supplement: Supplementary file 1 [file ijms-23-10340-s001.zip › Table S2.xlsx]

## Sheet: DE miRNA
miRNA	log2FC	log2CPM	LR	P-Value	FDR	Comparison
miR-1249-3p	2.66349	7.09682	12.1377	0.00129305	0.0222969	ACD-EDTA
miR-4433b-5p	2.39226	10.7254	51.7043	1.627e-08	1.58981e-06	ACD-EDTA
miR-409-3p	1.95203	8.77203	30.2109	3.06344e-06	0.000128289	CTAD-EDTA
miR-4433b-5p	1.89136	10.7254	36.491	5.63253e-07	3.30227e-05	Citrate-EDTA
miR-409-3p	1.87629	8.77203	29.2705	4.00491e-06	0.000155058	ACD-EDTA
miR-340-5p	1.85386	7.47824	11.3894	0.0017522	0.0278722	ACD-EDTA
miR-409-3p	1.85116	8.77203	29.6609	3.58147e-06	0.000141331	Citrate-EDTA
miR-4433b-5p	1.65346	10.7254	24.7628	1.53512e-05	0.000543115	CTAD-EDTA
miR-145-3p	1.50579	8.6289	12.3955	0.00116609	0.0206278	CTAD-EDTA
miR-483-3p	1.36093	8.03839	9.74945	0.00348431	0.0461278	ACD-EDTA
miR-199a-5p	1.35608	7.79047	9.71512	0.003536	0.046512	ACD-EDTA
miR-1260b	1.20432	9.26459	13.0892	0.000885884	0.0169116	ACD-EDTA
miR-223-3p	1.12908	13.0356	34.9658	8.37647e-07	4.29713e-05	CTAD-EDTA
miR-28-3p	1.08177	9.38586	10.6766	0.00235343	0.0347428	CTAD-EDTA
miR-199a-3p	1.07181	10.1981	20.2191	6.65537e-05	0.00206922	Citrate-EDTA
miR-223-3p	1.06737	13.0356	35.0826	8.12321e-07	4.27406e-05	Citrate-EDTA
miR-199a-3p	1.02743	10.1981	18.4047	0.000123985	0.0034786	ACD-EDTA
miR-223-3p	0.957703	13.0356	28.6248	4.82528e-06	0.00018336	ACD-EDTA
miR-23a-3p	0.918077	13.7121	24.8897	1.47606e-05	0.000531382	Citrate-EDTA
miR-199a-3p	0.907946	10.1981	13.1703	0.000858158	0.0167709	CTAD-EDTA
miR-23a-3p	0.871231	13.7121	19.8379	7.57079e-05	0.0023187	CTAD-EDTA
miR-27a-3p	0.8566	12.2059	17.3204	0.000181825	0.00466381	CTAD-EDTA
miR-23b-3p	0.853257	10.2236	11.8506	0.00145192	0.0244207	ACD-EDTA
miR-423-3p	0.847164	13.0231	18.2949	0.000128837	0.0034786	ACD-EDTA
miR-23b-3p	0.844669	10.2236	12.2992	0.00121189	0.0212547	Citrate-EDTA
miR-27a-3p	0.832978	12.2059	18.0058	0.000142599	0.00375144	Citrate-EDTA
miR-23b-3p	0.825494	10.2236	10.5752	0.00245539	0.035652	CTAD-EDTA
miR-23a-3p	0.803374	13.7121	18.8712	0.000105428	0.00304703	ACD-EDTA
miR-484	0.78904	10.6973	10.611	0.00241885	0.0354534	ACD-Citrate
miR-423-3p	0.688534	13.0231	11.1083	0.00196705	0.0301223	CTAD-EDTA
miR-27a-3p	0.670689	12.2059	11.6878	0.00155113	0.025641	ACD-EDTA
miR-423-3p	0.615725	13.0231	9.87153	0.00330692	0.0440636	Citrate-EDTA
miR-425-5p	-0.6217	11.1821	10.2178	0.00285416	0.0393069	Citrate-EDTA
miR-423-5p	-0.624027	12.5389	9.94065	0.00321077	0.0430621	Citrate-EDTA
miR-425-5p	-0.667898	11.1821	10.5359	0.0024962	0.035652	CTAD-EDTA
miR-22-3p	-0.681436	13.4064	13.0961	0.000883484	0.0169116	Citrate-EDTA
let-7i-5p	-0.703113	11.9065	10.2309	0.00283837	0.0393069	Citrate-EDTA
miR-142-5p	-0.714303	11.8287	11.414	0.00173463	0.0278083	Citrate-EDTA
miR-425-5p	-0.727427	11.1821	13.8699	0.00065378	0.0134156	ACD-EDTA
miR-423-5p	-0.735015	12.5389	12.737	0.00101797	0.0186506	CTAD-EDTA
let-7g-5p	-0.75716	13.1608	11.9131	0.00141567	0.0240078	Citrate-EDTA
miR-22-3p	-0.776515	13.4064	15.5791	0.00034262	0.00817506	CTAD-EDTA
let-7g-5p	-0.801408	13.1608	12.6655	0.00104724	0.0189464	ACD-EDTA
miR-142-5p	-0.870054	11.8287	14.5733	0.000499592	0.0108471	CTAD-EDTA
let-7i-5p	-0.871411	11.9065	15.0957	0.000410275	0.00956688	ACD-EDTA
miR-142-5p	-0.884608	11.8287	17.2716	0.000185023	0.00468724	ACD-EDTA
let-7i-5p	-0.936525	11.9065	16.2686	0.000265837	0.00649402	CTAD-EDTA
miR-652-3p	-0.962281	10.6312	18.3213	0.000127651	0.0034786	Citrate-EDTA
miR-423-5p	-0.97672	12.5389	24.2498	1.80077e-05	0.000626301	ACD-EDTA
miR-652-3p	-0.996035	10.6312	19.1644	9.52888e-05	0.00279332	ACD-EDTA
miR-22-3p	-1.01691	13.4064	29.8233	3.41955e-06	0.000137587	ACD-EDTA
let-7g-5p	-1.02075	13.1608	18.3569	0.000126076	0.0034786	CTAD-EDTA
miR-3613-5p	-1.10076	9.71737	14.725	0.0004717	0.0105421	Citrate-EDTA
miR-144-5p	-1.15077	9.1337	11.6496	0.00157548	0.0256578	CTAD-EDTA
miR-652-3p	-1.15408	10.6312	24.145	1.86076e-05	0.000636379	CTAD-EDTA
miR-3613-5p	-1.26189	9.71737	19.2766	9.16866e-05	0.00272668	ACD-EDTA
miR-92a-3p	-1.28248	16.0754	32.855	1.47246e-06	6.71443e-05	ACD-EDTA
miR-374a-5p	-1.30076	8.47454	10.7794	0.00225464	0.0337702	CTAD-EDTA
miR-185-5p	-1.33008	9.80093	23.9008	2.00897e-05	0.000664905	Citrate-EDTA
miR-101-3p	-1.38975	10.8235	32.0079	1.85596e-06	8.27919e-05	Citrate-EDTA
miR-502-3p	-1.39838	9.72525	14.755	0.000466384	0.0105421	ACD-EDTA
miR-144-5p	-1.41406	9.1337	18.773	0.000109075	0.00310864	ACD-EDTA
miR-93-5p	-1.41421	10.4588	34.6115	9.19697e-07	4.49338e-05	Citrate-EDTA
miR-93-5p	-1.43174	10.4588	35.6182	7.06108e-07	3.85508e-05	ACD-EDTA
let-7b-5p	-1.44997	14.8801	29.9743	3.27585e-06	0.000134441	ACD-EDTA
miR-2110	-1.45532	8.28315	13.0772	0.000890085	0.0169116	CTAD-EDTA
miR-2110	-1.46911	8.28315	14.0192	0.000617276	0.012925	Citrate-EDTA
miR-502-3p	-1.47179	9.72525	15.424	0.000362931	0.00856016	CTAD-EDTA
miR-484	-1.49151	10.6973	34.0384	1.0709e-06	5.11043e-05	ACD-EDTA
miR-15a-5p	-1.51177	8.29915	13.5783	0.00073188	0.0145808	Citrate-EDTA
miR-7-5p	-1.52207	9.53259	24.0453	1.91981e-05	0.000645813	Citrate-EDTA
miR-25-3p	-1.52437	13.8861	55.5646	7.3161e-09	9.3829e-07	ACD-EDTA
let-7b-5p	-1.52664	14.8801	35.5884	7.11617e-07	3.85508e-05	Citrate-EDTA
miR-185-5p	-1.63269	9.80093	35.5761	7.13904e-07	3.85508e-05	ACD-EDTA
miR-15a-5p	-1.65233	8.29915	14.6409	0.000486955	0.0107444	CTAD-EDTA
miR-93-5p	-1.68832	10.4588	44.6862	7.66232e-08	5.24103e-06	CTAD-EDTA
miR-7-5p	-1.70771	9.53259	31.5051	2.13233e-06	9.30966e-05	ACD-EDTA
miR-101-3p	-1.70965	10.8235	47.158	4.37258e-08	3.20448e-06	ACD-EDTA
miR-7-5p	-1.71533	9.53259	28.5205	4.97366e-06	0.000185563	CTAD-EDTA
miR-92a-3p	-1.79993	16.0754	62.9429	1.73938e-09	3.24473e-07	Citrate-EDTA
miR-15b-5p	-1.80937	10.4985	43.2835	1.0618e-07	6.8088e-06	ACD-EDTA
miR-3613-5p	-1.81032	9.71737	34.6835	9.02379e-07	4.49338e-05	CTAD-EDTA
miR-25-3p	-1.82455	13.8861	77.2543	1.42687e-10	4.18277e-08	Citrate-EDTA
miR-107	-1.82476	8.65468	10.2867	0.00277225	0.0386983	Citrate-EDTA
miR-101-3p	-1.84605	10.8235	49.3134	2.71815e-08	2.14525e-06	CTAD-EDTA
miR-106b-3p	-1.85083	7.53863	11.2478	0.00185709	0.0288694	ACD-EDTA
miR-16-5p	-1.8514	15.7895	57.9891	4.50613e-09	6.16439e-07	ACD-EDTA
miR-363-3p	-1.86011	10.4558	44.394	8.19725e-08	5.42605e-06	Citrate-EDTA
miR-15a-5p	-1.86943	8.29915	19.4146	8.74521e-05	0.00263899	ACD-EDTA
miR-363-3p	-1.89471	10.4558	48.3589	3.34998e-08	2.54598e-06	ACD-EDTA
let-7b-5p	-1.90009	14.8801	46.5569	5.00376e-08	3.54059e-06	CTAD-EDTA
miR-16-5p	-1.90316	15.7895	61.2603	2.39006e-09	3.77262e-07	Citrate-EDTA
miR-107	-1.91717	8.65468	11.7264	0.00152699	0.0254746	ACD-EDTA
miR-16-2-3p	-1.94383	10.9684	62.0416	2.06075e-09	3.52388e-07	ACD-EDTA
miR-92a-3p	-1.95162	16.0754	64.8353	1.22456e-09	2.51279e-07	CTAD-EDTA
miR-15b-5p	-1.95563	10.4985	50.1191	2.28279e-08	1.87371e-06	Citrate-EDTA
miR-486-3p	-1.9751	10.728	39.9396	2.36831e-07	1.42935e-05	ACD-EDTA
miR-25-3p	-1.99325	13.8861	83.1927	5.54567e-11	3.39482e-08	CTAD-EDTA
miR-486-5p	-1.99507	17.4729	51.2225	1.80219e-08	1.68095e-06	ACD-EDTA
miR-486-3p	-2.02591	10.728	42.3004	1.3393e-07	8.32803e-06	Citrate-EDTA
miR-185-5p	-2.08884	9.80093	52.3192	1.42914e-08	1.4663e-06	CTAD-EDTA
miR-451a	-2.1307	18.5125	50.352	2.17113e-08	1.85632e-06	ACD-EDTA
miR-484	-2.13607	10.6973	60.3704	2.83391e-09	4.1537e-07	CTAD-EDTA
miR-363-3p	-2.14214	10.4558	52.8287	1.28443e-08	1.38718e-06	CTAD-EDTA
miR-15b-5p	-2.19444	10.4985	53.3623	1.14931e-08	1.31022e-06	CTAD-EDTA
miR-484	-2.28055	10.6973	74.8683	2.11566e-10	5.42666e-08	Citrate-EDTA
miR-451a	-2.29571	18.5125	54.4715	9.14182e-09	1.10347e-06	Citrate-EDTA
miR-4732-3p	-2.30271	8.89845	27.4205	6.8669e-06	0.000251623	ACD-EDTA
miR-16-2-3p	-2.3115	10.9684	80.3316	8.69078e-11	3.39482e-08	Citrate-EDTA
miR-486-3p	-2.33854	10.728	50.7332	2.0006e-08	1.78488e-06	CTAD-EDTA
miR-16-2-3p	-2.39732	10.9684	79.6271	9.72399e-11	3.39482e-08	CTAD-EDTA
miR-16-5p	-2.42147	15.7895	85.6461	3.80522e-11	3.39482e-08	CTAD-EDTA
miR-107	-2.42706	8.65468	16.4182	0.000251729	0.00622347	CTAD-EDTA
miR-144-3p	-2.46819	8.47128	16.8608	0.000214432	0.00536602	ACD-EDTA
miR-324-3p	-2.49339	7.73897	17.6456	0.000161953	0.00420667	CTAD-EDTA
miR-144-3p	-2.51734	8.47128	18.0808	0.000138882	0.00370113	Citrate-EDTA
miR-486-5p	-2.57026	17.4729	79.4983	9.92639e-11	3.39482e-08	Citrate-EDTA
miR-451a	-2.6711	18.5125	67.1206	8.0862e-10	1.84365e-07	CTAD-EDTA
miR-486-5p	-2.70664	17.4729	80.6174	8.30532e-11	3.39482e-08	CTAD-EDTA
miR-4732-3p	-2.75374	8.89845	31.0925	2.39154e-06	0.000102238	CTAD-EDTA
miR-4732-3p	-2.75388	8.89845	32.9538	1.43352e-06	6.68543e-05	Citrate-EDTA
miR-3158-3p	-2.87263	7.00633	11.9385	0.00140119	0.0239603	CTAD-EDTA
miR-3158-3p	-2.89027	7.00633	13.0369	0.000904282	0.0170237	Citrate-EDTA
miR-144-3p	-3.1075	8.47128	21.1686	4.84798e-05	0.00153047	CTAD-EDTA
miR-7976	-5.36206	6.18221	13.2373	0.000835931	0.0164936	CTAD-EDTA
