# Supplementary material for: The Impact of the Anticoagulant Type in Blood Collection Tubes on Circulating Extracellular Plasma MicroRNA Profiles Revealed by Small RNA Sequencing
Source: Int J Mol Sci. 2022 Sep 7;23(18):10340. doi: 10.3390/ijms231810340 (PMC9499385; doi:10.3390/ijms231810340)
Supplement: Supplementary file 1 [file ijms-23-10340-s001.zip › Table S3.xlsx]

## Sheet: qPCR Cq values
Target Name	miR_PA_01_A	miR_PA_01_B	miR_PA_01_C	miR_PA_01_D	miR_PA_02_A	miR_PA_02_B	miR_PA_02_C	miR_PA_02_D	miR_PA_04_A	miR_PA_04_B	miR_PA_04_C	miR_PA_04_D	miR_PA_05_A	miR_PA_05_B	miR_PA_05_C	miR_PA_05_D	miR_PA_06_A	miR_PA_06_B	miR_PA_06_C	miR_PA_06_D	miR_PA_07_A	miR_PA_07_B	miR_PA_07_C	miR_PA_07_D	miR_PA_08_A	miR_PA_08_B	miR_PA_08_C	miR_PA_08_D	miR_PA_09_A	miR_PA_09_B	miR_PA_09_C	miR_PA_09_D	miR_PA_10_A	miR_PA_10_B	miR_PA_10_C	miR_PA_10_D	miR_PA_03_A	miR_PA_03_B	miR_PA_03_C	miR_PA_03_D
miR-16-5p	16.0791	16.9528	17.9831	14.5937	18.5411	18.2357	20.8132	16.0924	19.3877	15.1622	18.6182	23.5671	25.4206	17.7923	27.6532	16.0904	16.6421	17.7941	17.6033	16.8504	18.2849	17.8344	17.6076	16.1421	20.6799	19.086	20.8477	17.3621	17.2291	20.1203	21.8558	15.7499	15.797	18.6971	17.7285	25.2466	19.0391	18.0263	28.1338	14.2875
miR-126-3p	17.9693	18.7314	18.5332	18.8967	20.2131	19.5126	21.8862	20.2179	20.6436	19.3022	19.9974	26.8667	27.2394	19.827	29.8271	20.6555	19.5222	19.7354	19.8573	20.3106	20.8131	19.6604	20.0409	21.6194	22.7305	20.7557	22.2847	21.2362	19.5795	22.3495	23.1226	20.0968	20.207	20.8292	20.8013	31.6211	21.1007	20.2379	29.9148	19.7555
miR-145-5p	21.2515	21.6184	21.5083	21.9482	21.3735	20.9542	22.2018	21.7976	21.7263	21.3603	21.5333	27.2804	24.4131	20.7752	26.7478	21.3847	20.4408	20.7461	20.8695	21.9378	20.478	20.0122	20.1089	20.2014	22.1793	21.4859	22.0507	21.752	20.2478	21.9578	22.8175	20.8851	20.7265	21.0469	20.8309	30.7225	21.4179	20.8371	29.5826	20.4841
miR-146a-5p	19.6938	20.2774	20.1978	20.6585	21.6274	21.4395	23.1991	23.1412	22.5205	21.3577	22.104	28.1504	28.1572	20.0997	29.9371	21.3571	21.0013	20.9587	20.8591	21.2589	22.2881	20.4167	21.9485	23.0283	23.7728	21.5259	21.7928	22.0574	20.5573	22.5744	23.6514	21.2996	21.8152	22.2154	22.6034	32.5594	22.936	21.4251	31.7046	21.9229
miR-150-5p	17.652	18.758	18.3879	18.9756	18.7652	18.9876	19.4093	18.6374	18.9415	18.8337	19.4661	23.774	20.7779	18.5827	23.1071	18.3807	17.9476	18.1673	18.6747	19.6241	17.5983	18.4796	17.9222	18.0913	18.6828	18.3364	19.6975	19.3451	17.9033	20.2803	20.3297	18.6441	18.2836	19.5269	18.8129	28.2851	19.3726	19.2031	27.5389	18.6499
miR-21-5p	18.5307	19.0951	19.3631	19.1029	20.559	19.5075	22.7566	20.5568	21.7664	19.4198	20.7533	27.1047	26.4324	19.7861	28.2217	20.1681	19.8338	19.5986	19.6688	20.6828	21.3736	19.9442	21.133	20.7768	22.6445	20.6134	22.2622	21.2501	19.4092	22.2973	23.4836	20.0225	20.3412	20.9275	20.9985	30.2797	21.1779	20.8519	30.4902	19.4171
miR-223-3p	15.8231	16.7491	17.2536	17.4713	17.4135	16.5631	18.3656	17.5899	17.8587	16.8725	17.4755	23.455	21.5096	16.6151	23.8537	17.5733	16.5185	16.6104	16.9719	18.2868	16.808	16.5043	16.8257	17.2485	18.6438	17.5251	18.5913	18.3984	15.7605	18.5003	18.8446	16.688	16.4955	17.2139	16.9221	26.5111	16.9424	16.425	25.71	16.4045
miR-92a-3p	17.6599	18.0899	18.9546	16.3146	19.8496	19.0174	20.5733	16.7018	20.9935	17.7365	20.1655	23.1768	23.3909	19.233	25.752	17.6541	18.2959	19.5302	19.2794	18.4729	19.0914	19.1681	20.0248	17.5645	21.004	20.3776	21.9667	18.9099	18.9798	21.1234	22.7812	17.8092	17.8612	20.0895	19.1999	27.0609	19.6609	19.3118	28.1182	16.1763
miR-23a-3p	20.7652	21.6124	21.5665	22.1269	22.8277	22.1246	23.7865	22.3445	24.2691	22.6259	23.2125	29.8746	28.5411	22.4659	30.7032	23.2124	23.0249	22.885	22.7939	23.7731	23.3766	22.2329	22.9475	23.6609	25.6094	23.7699	24.9145	24.6868	22.1672	24.9903	25.9587	23.1712	23.4911	23.8451	23.9314	34.6531	23.8502	22.8612	32.1463	22.7659
miR-451a	13.4385	14.068	15.4907	11.377	15.2821	15.5051	16.5629	12.6873	15.8881	11.9477	15.7249	18.6076	19.7888	14.9771	22.0869	12.1027	13.8882	15.1926	14.8086	13.1807	15.4149	15.3638	16.2218	12.8682	16.8043	15.6475	16.8564	13.3046	14.606	16.1345	17.5044	11.9825	12.8551	15.5296	15.1174	22.3378	15.5182	15.1359	25.197	11.5802
miR-30e-5p	24.215	24.8166	25.0443	23.429	25.8155	25.0336	27.0248	24.7039	26.7101	24.2601	26.0335	34.0584	32.215	24.9577	35.9003	24.5958	25.667	25.3136	24.8785	25.0825	26.0494	24.8301	25.3884	25.7057	28.0248	26.4047	27.9199	26.4652	25.4472	28.1636	28.8401	25.0559	25.9011	26.6661	26.8394	45	26.4949	26.0322	41.1244	24.275
miR-17-5p	18.7596	19.5667	20.3879	17.6335	21.4015	22.369	22.4943	19.3782	22.0139	18.2218	21.6088	25.5662	27.8411	20.3574	29.0699	18.8486	19.8579	20.7683	20.5884	19.7511	22.1931	20.6707	22.0542	19.5541	23.0814	21.5855	22.8738	19.9176	20.3085	22.465	24.0396	19.32	18.9981	21.2692	21.2942	28.9707	21.5887	20.6367	30.3282	17.8387
